1 MCRiceRepGP: a framework for identification of sexual  
2 reproduction associated coding and lincRNA genes in rice.

3 Agnieszka A. Golicz<sup>1</sup>

4 Prem L. Bhalla<sup>1</sup>

5 Mohan B. Singh<sup>1</sup>

6 <sup>1</sup>Plant Molecular Biology and Biotechnology Laboratory, Faculty of Veterinary and  
7 Agricultural Sciences, University of Melbourne, Parkville, Melbourne, VIC, Australia.

8 Corresponding author: Agnieszka A. Golicz [agnieszka.golicz@unimelb.edu.au](mailto:agnieszka.golicz@unimelb.edu.au)

9 Corresponding author: Mohan B. Singh [mohan@unimelb.edu.au](mailto:mohan@unimelb.edu.au)

10 Number of tables: 3

11 Number of figures: 5 (all figures should be reproduced in colour)

12 Number of SI files: 2

13

## 14 **Significance statement**

15 Rice is a staple food crop plant for over half of the world's population and sexual reproduction  
16 resulting in grain formation is a key process underpinning global food security. Despite  
17 considerable research efforts, much remains to be learned about the molecular mechanisms  
18 involved in rice sexual reproduction. We have developed MCRiceRepGP, a novel framework  
19 which allows prediction of sexual reproduction associated genes using multi-omics data,  
20 multicriteria decision analysis and machine learning. The genes identified and the methodology  
21 developed will become a significant resource for the plant research community.

## 22 **Abstract**

23 Sexual reproduction in plants underpins global food production and evolution. It is a complex  
24 process, requiring intricate signalling pathways integrating a multitude of internal and external  
25 cues. However, key players and especially non-coding genes controlling plant sexual  
26 reproduction remain elusive. We report the development of MCRiceRepGP a novel machine  
27 learning framework, which integrates genomic, transcriptomic, homology and available  
28 phenotypic evidence and employs multi-criteria decision analysis and machine learning to  
29 predict coding and non-coding genes involved in rice sexual reproduction.

30 The rice genome was re-annotated using deep sequencing transcriptomic data from  
31 reproduction-associated tissues/cell types identifying novel putative protein coding genes,  
32 transcript isoforms and long intergenic non-coding RNAs (lincRNAs). MCRiceRepGP was  
33 used for genome-wide discovery of sexual reproduction associated genes in rice; 2,275 protein-  
34 coding and 748 lincRNA genes were predicted to be involved in sexual reproduction. The  
35 annotation performed and the genes identified, especially the ones for which mutant lines with  
36 phenotypes are available provide a valuable resource. The analysis of genes identified gives  
37 insights into the genetic architecture of plant sexual reproduction. MCRiceRepGP can be used  
38 in combination with other genome-wide studies, like GWAS, giving more confidence that the  
39 genes identified are associated with the biological process of interest. As more data, especially  
40 about mutant plant phenotypes will become available, the power of MCRiceRepGP will grow  
41 providing researchers with a tool to identify candidate genes for future experiments.  
42 MCRiceRepGP is available as a web application (<http://mcgplannotator.com/MCRiceRepGP/>)

## 43 **Key words**

44 function prediction, machine learning, *Oryza sativa*, re-annotation, rice, sexual reproduction;  
45 lincRNA

## 46 **Introduction**

47 Sexual reproduction is a core process in the life cycle of a vast majority of eukaryotic  
48 organisms. It is the main source of genetic diversity, which in turn allows for evolution and  
49 adaptation. From economic perspective, sexual reproduction results in formation of edible fruit  
50 and grains, underpinning crop yield and global food security. In plants, sexual reproduction is  
51 initiated by the vegetative to reproductive phase transition, requiring intricate signalling  
52 pathways integrating a multitude of internal and external cues. Upon commitment to flowering  
53 the process involves the development of reproductive organs, successful completion of male  
54 and female meiosis and fertilization, followed by embryonic development. Biological  
55 processes involved in sexual reproduction consist of evolutionarily conserved core components  
56 (for example, basic reproductive organ development including anthers and pistils and meiosis)  
57 (Schurko and Logsdon, 2008, Wallace *et al.*, 2011, Gómez *et al.*, 2015) and a species-specific  
58 regulatory level, for example the details of floral organ morphology and control of fine tuning  
59 of timing of vegetative to reproductive phase transition (Jarillo and Piñeiro, 2011, Moyroud  
60 and Glover, 2017). Knowledge of both, the level of conservation of core components and the  
61 species-specific characteristics of reproductive processes is crucial for understanding of plant  
62 fertility. Despite considerable research efforts the molecular basis of plant reproduction is not  
63 yet fully understood.

64 Rice is an important cereal crop, providing staple food for over a half of the world's population.  
65 It is a monocotyledonous plant species with a relatively compact genome. The rice genome  
66 was one of the first plant genomes to be sequenced, providing a tremendous resource for plant  
67 research community. However, despite considerable research efforts, many of the genes  
68 involved in sexual reproduction remain uncharacterized (Kun *et al.*, 2013, Niu *et al.*, 2013, Fu  
69 *et al.*, 2014, Rhee and Mutwil, 2014, Hu *et al.*, 2015, Yao *et al.*, 2017). Several computational  
70 methods have been applied to improve understanding of gene functions. Studies of sequence  
71 homology between the most extensively studied and functionally annotated proteome of  
72 *Arabidopsis thaliana* and other species, including rice, allowed identification of genes with  
73 conserved functions (Gómez *et al.*, 2015). Construction of co-expression networks allowed

74 identification of regulatory hubs involved in plant developmental processes, including anther  
75 development (You *et al.*, 2016, de Luis Balaguer *et al.*, 2017, Lin *et al.*, 2017). Analysis of  
76 expression profiles across tissues pinpointed genes with defined spatio-temporal expression  
77 patterns, which could be involved in organ, tissue or cell-specific processes (Edwards and  
78 Coruzzi, 1990). Studies of phenotypes of mutant lines provided annotation of genes with  
79 unknown functions (Miyao *et al.*, 2003, Miyao *et al.*, 2007). Genome-wide studies of diversity  
80 across hundreds of lines allowed identification of functionally important regions of increased  
81 or reduced diversity, helping pinpoint genes which display high sequence conservation within  
82 species (Alexandrov *et al.*, 2015, Tatarinova *et al.*, 2016).

83 Individually those approaches provide valuable insights into gene functions. The challenge is  
84 to combine all the resources into a unified framework to produce a list of reliable candidate  
85 genes involved in the biological process of interest (Troyanskaya *et al.*, 2003, Bradford *et al.*,  
86 2010, Bargsten *et al.*, 2014). Our aim was to discover novel coding genes and lincRNAs  
87 involved in rice sexual reproduction. To achieve that we have developed a set of rules to  
88 prioritize the genes of interest and a novel method which combines information from gene  
89 expression studies, sequence homology, known functional annotation, mutational data and  
90 sequence diversity analysis. The method developed – MCRiceRepGP (Multi Criteria Rice  
91 Reproductive Gene Predictor) predicts gene's potential for involvement in sexual reproduction  
92 using available multi-omics data, multi-criteria decision analysis, and machine learning. We  
93 applied the method to all rice genes and identified 2,275 protein coding and 748 lincRNA genes  
94 involved in rice reproductive processes. The manuscript also presents the first study of  
95 lincRNAs in plant gametes. A subset of the genes identified was linked to male and female-  
96 specific plant fertility. Several genes linked to reproductive stage heat stress tolerance were  
97 identified. For the purposes of the study, a full rice genome re-annotation using RNASeq  
98 datasets from 11 tissues and cell types has been performed. MCRiceRepGP is available as a  
99 web application (<http://mcgplannotator.com/MCRiceRepGP/>).

## 100 **Experimental procedures**

### 101 **Datasets used**

102 The rice genome assembly and annotation (MSU v7) and *A. thaliana* protein sequences (TAIR  
103 10) were obtained from Phytozome v12.1 (Goodstein *et al.*, 2012). The RNASeq datasets were  
104 downloaded from Sequence Read Archive (Table S1). To maximize mapping specificity and

105 minimize batch effects RNASeq from a minimum number of studies, covering maximum  
106 number of reproductive and vegetative tissues with read length equal or longer than 100 base  
107 were used. Phenotypic data for Tos17 rice mutant lines were downloaded from  
108 <https://tos.nias.affrc.go.jp/> and the insertion coordinates were downloaded from  
109 <http://orygenesdb.cirad.fr/>. Gene ontology (GO) annotation of *A. thaliana* genes were  
110 downloaded from TAIR (ATH\_GO\_GOSLIM.txt, downloaded on: 20.07.2017) (Berardini *et*  
111 *al.*, 2015).

## 112 **Parameters used**

113 Detailed commands for all the tools listed in the sections below can be found in Method S1.

## 114 **Genome reannotation**

115 The RNASeq reads were mapped to the reference genome using Hisat2 v2.0.5 (Kim *et al.*,  
116 2015) and the parameters were adjusted for stranded libraries. Transcripts were assembled  
117 separately for each library using StringTie v1.3.3b (Pertea *et al.*, 2015) and the parameters were  
118 adjusted for stranded libraries. The annotations were then merged with the existing rice  
119 annotation. lincRNAs were identified using procedure previously described (Golicz *et al.*,  
120 2018b). In short, coding potential of genes was evaluated using Coding Potential Calculator 2  
121 (Kang *et al.*, 2017) and homology to know protein coding genes. Transcripts were compared  
122 using DIAMOND v0.8.24.86 (Buchfink *et al.*, 2015) blastx against NCBI RefSeq (O'Leary *et*  
123 *al.*, 2016) protein database (downloaded on: 11.07.2017). A gene was considered coding if any  
124 of the transcripts were classified as coding by CPC2 or had a significant match in RefSeq  
125 database. The (long intergenic non-coding RNAs) lincRNAs were identified by comparing  
126 positions of coding and non-coding genes using bedtools (Quinlan and Hall, 2010). All non-  
127 coding genes which did not overlap any protein coding loci were classified as lincRNAs.

## 128 **Expression level evaluation**

129 The reads mapping to gene loci were counted using featureCounts v1.5.1 (Liao *et al.*, 2014).  
130 The FPKM values were calculated as:  $(10^9 * \text{fragments mapped to exons} / \text{assigned}$   
131  $\text{fragments} * \text{total length of exons})$ . The  $\log_{1p}(\text{FPKM})$  values were adjusted for batch effects  
132 using Combat v3.24.4 (Johnson *et al.*, 2007). The data used originated from three different  
133 studies, which was accounted for during batch effect adjustment.

## 134 **Homology analysis**

135 For each coding gene representative (longest isoform) transcript was compared against the set  
136 of *A. thaliana* proteins (longest isoforms) using NCBI blastx v2.6.0 (Camacho *et al.*, 2009).  
137 GO annotations were transferred from *A. thaliana* genes to best matches (with lowest e-value)  
138 among the rice genes.

## 139 **Community analysis**

140 Expression values were calculated by counting the number of reads mapping to each gene using  
141 FeatureCounts v1.5.1 (Liao *et al.*, 2014). The Spearman correlations were computed using corr  
142 function of psych package (Revelle, 2017). Top 5% of positive and negative correlations were  
143 used to build a co-expression network using Mutual Rank method (Obayashi *et al.*, 2009) ( $MR$   
144  $< 30$ ). The Clique Percolation Method (Palla *et al.*, 2005) was used  
145 (<https://sites.google.com/site/cliqueperccomp/>) to identify putative functional modules within  
146 co-expression network. GO enrichment of nodes was calculated using topGO package v2.28.0  
147 (Alexa *et al.*, 2006), using method 'weight' to adjust for multiple comparisons ( $p < 0.01$ ).

## 148 **Diversity analysis**

149 The filtered SNP set (18 M) was downloaded from SNP-Seek database (Alexandrov *et al.*,  
150 2015). The number of SNPs falling within exons of each genes was counted and divided by  
151 total exon length of the gene as calculated by featureCounts. The gene was considered to be  
152 low diversity if the SNP density was below half of the median SNP density calculated using  
153 all genes.

## 154 **Process Involvement score parametrization**

155 The Process Involvement (PI) score has seven components, which are weighted differently  
156 depending on their relative importance. Using knowledge of the field to supply probabilities  
157 for analysis of networks has been previously successfully applied (Troyanskaya *et al.*, 2003).  
158 The weights assume values between 0 and 1 and the values used were  $\alpha=0.6$ ,  $\beta=0.6$ ,  $\gamma=0.4$ ,  
159  $\delta=0.3$ ,  $\epsilon=0.2$ ,  $\zeta=0.1$ . The phenotypic data (P,  $\alpha=0.6$ ) and sequence homology with known  
160 sexual reproduction regulators (H,  $\beta=0.6$ ) were considered to be the most important pieces of  
161 evidence and therefore were assigned the highest weight. Because one of the objectives of the  
162 study was to uncover key regulators of sexual reproduction, participation in functional co-  
163 expression modules was also considered important (CP,  $\gamma=0.4$ ; CF,  $\delta=0.3$ ). Sequence diversity  
164 was also included, but given lower weighting. If genes had similar evidentiary support from

165 phenotypic and/or homology data and network-connectivity, genes with lower diversity are  
166 hypothesized to be more likely regulators as transcription factors were shown to be the genes  
167 with lowest diversity in the rice genome (Tatarinova *et al.*, 2016). Finally, the expression value  
168 (EV,  $\zeta=0.1$ ) was given lowest weighting to prevent it from over-powering the entire score.  
169 Further details: Note S2.

## 170 **Classifiers**

171 Three classifier were tested: (1) the Naïve Bayes classifier as implemented in function  
172 naiveBayes of package e1071 v1.6-8 (Meyer, 2017), (2) Classification Tree as implemented in  
173 function rpart of package rpart v4.1-11 (Therneau *et al.*, 2017), (3) Logistic Regression as  
174 implemented in method glm (R Core Team). Five-fold cross validation was used to measure  
175 the concordance between classifier prediction and test datasets. Further details: Method S2,  
176 Notes S3-S5.

## 177 **Test datasets**

178 Ten genes known to have confirmed crucial roles in sexual reproduction were chosen as test  
179 dataset (Test Set 1) (Gómez *et al.*, 2015, Shi *et al.*, 2015a). Additionally, 781 genes implicated  
180 to be involved in sexual reproduction (<https://funricegenes.github.io/>) and highly expressed in  
181 reproductive tissues were used (Test Set 2).

## 182 **Fst score calculation**

183 The 18M SNP dataset downloaded from SNP-Seek database was used. The *japonica* sub-  
184 population include temp and trop lines. The *indica* subpopulation included ind1, ind2 and ind3  
185 lines. SNPs with minor allele frequency  $< 0.01$  were remove from the dataset. Fst values were  
186 calculated using vcftools, with window size of 100kb and step of 10kb. Windows which fell  
187 within top 5% of highest Fst values (mean value) were retained, merged and compared with  
188 positions of SexRep genes.

## 189 **Data availability**

190 Rice genome reannotation and files used as input for MCRiceRepGP can be found at:  
191 <https://osf.io/78axs/>.

192 Source code can be obtained from: <https://github.com/agolicz/MCRiceRepGP> and  
193 <https://github.com/agolicz/MCRiceRepGP-shiny>.

194 Web application can be found at: <http://mcgplannotator.com/MCRiceRepGP/>.



## 195 **Results**

### 196 **Rice genome re-annotation using RNASeq data**

197 The two available rice genome annotations (MSU-RAP and RAP-DB) were performed before  
198 RNASeq data was widely available and gene evidentiary support relied mostly on ESTs, which  
199 used to be derived from pools of samples, likely missing genes expressed at lower levels,  
200 transiently expressed or in low abundance cell types (Note S1). This is an especially important  
201 consideration while investigating sexual reproduction which depends on precise  
202 spatiotemporal gene expression regulating cell fate commitment and specification involving a  
203 small number of specialized cell types. Additionally, a mounting body of evidence accumulated  
204 since the last rice genome annotation points to important roles of long non-coding RNAs in  
205 sexual reproduction and those should also be included in the analyses (Golicz *et al.*, 2018a).  
206 Long intergenic non-coding RNA (lincRNA) annotation in rice has been performed previously  
207 (Zhang *et al.*, 2014, Wang *et al.*, 2015a), however the transcriptomes of egg, pollen sperm, and  
208 vegetative cells were not included.

209 Accordingly, we updated the MSU-RAP annotation using RNASeq data from multiple rice  
210 tissues and cell types (leaf, root, shoot, flower, seed, anther, pistils, sperm, cell, egg cell,  
211 vegetative cell). The final annotation comprised 56,118 loci, including 46,149 protein-coding  
212 and 9,969 lincRNA loci (Note S1, Table S2). The expression profile of newly discovered  
213 putative protein-coding loci (7,218 genes, 65.9% containing open reading frame (ORF) >100  
214 amino acids and 42.4% containing complete ORF > 100 amino acids) was analysed, and 80.9%  
215 of genes showed highest expression levels in reproductive tissues, suggesting that a number of  
216 reproduction related genes may be missing from the available MSU-RAP annotation (Fig. S1).  
217 The updated annotation is well suited for the study of rice reproductive processes. It also  
218 highlights the significance of including expression data from specialized organs and low  
219 abundance cell types, especially those highly relevant to the study performed.

### 220 **The MCRiceRepGP method and its application for identification of reproduction** 221 **associated genes in rice**

222 Many publicly available rice genomic, transcriptomic and mutational datasets and databases  
223 exist (Ware *et al.*, 2002, Droc *et al.*, 2006, Miyao *et al.*, 2007, Alexandrov *et al.*, 2015, Wang  
224 *et al.*, 2015b). Using the updated genome annotation, these resources can be employed to help  
225 identify genes associated with biological processes of interest, in this case sexual reproduction.



226 MCRiceRepGP uses information about seven features: tissue expression profile (tissue type  
227 and expression levels), connectivity within co-expression network, co-expression hub  
228 functional annotation, existing mutational data with phenotypic information, sequence  
229 homology and single nucleotide polymorphism (SNP) diversity to calculate gene score and  
230 predict whether the gene is involved in a biological process (Table 1, Fig 1).

## 231 **Tissue expression profile analysis and gene co-expression network construction**

### 232 *Tissue expression profile analysis*

233 Expression of all the rice genes across tissues was measured by quantifying number of RNASeq  
234 reads mapped to each gene locus and calculating FPKM (fragments per kilo base per million)  
235 value (Fig. S2). Because the dataset originated from several different studies, the expression  
236 values were adjusted in order to remove batch effects (Johnson *et al.*, 2007). Genes which are  
237 involved in a given process often show high or unique expression in related tissue (Wen *et al.*,  
238 2016, Boyle *et al.*, 2017, Golicz *et al.*, 2018b). The samples were classified as either  
239 representing vegetative or reproductive tissue (Table S4). For each gene, the tissue and tissue  
240 type with highest expression levels observed was recorded. In total 72.6% (68.1% on non-  
241 batch-adjusted data) genes had the highest expression level in reproductive tissue/cell type. A  
242 high number of genes having peak expression in reproductive tissues is expected. Reproductive  
243 processes are complex, requiring developmental transitions, cell fate decisions and formation  
244 of multiple highly specialized cell types in male and female gametophytes, therefore are  
245 expected to engage a multitude of genes.

### 246 *Co-expression network construction*

247 The FPKM expression values were used to calculate all-vs-all Spearman correlations and the  
248 gene pairs within the top 5% (corresponding to minimum  $\rho=0.725$  for positive correlations)  
249 or bottom 5% (corresponding to maximum  $\rho=-0.619$  for negative correlations) correlation  
250 values were used to build a co-expression network containing 50,212 nodes and 678,548 edges.  
251 Within the network, it is possible to identify sub-populations of tightly connected nodes – so  
252 called communities (Acharya *et al.*, 2012). These likely correspond to functional modules  
253 related to distinct biological roles. The whole network was analysed using Clique Percolation  
254 Method (Palla *et al.*, 2005), detecting 5,791 communities (putative functional modules). The  
255 modules were then functionally annotated using gene ontology (GO) enrichment analysis.  
256 Following the procedure used in the MSU-RAP annotation, the rice genes were annotated with  
257 GO terms corresponding to the most significant BLAST match in the *A. thaliana* proteome and

258 GO enrichment for each module was calculated using all genes as background. The  
259 significantly enriched terms ( $p < 0.01$ ) were assigned to modules as the functional annotation.  
260 In total, 4,044 modules were annotated with at least one GO term. The assigned terms were  
261 then manually inspected to identify key words/phrases associated with sexual reproduction  
262 (Table S5). Nodes which were annotated with at least one GO term containing a key  
263 word/phrase were annotated as associated with sexual reproduction (566 modules in total).

#### 264 **Insertional mutant data**

265 To date, the most comprehensive rice mutant panel with a published collection of phenotypes  
266 are the ~50,000 transposon Tos17 insertion lines (Miyao *et al.*, 2003, Miyao *et al.*, 2007). The  
267 link between disruption of gene sequence and the observed phenotype can be indicative of gene  
268 function. However, analysis of the dataset poses several challenges. Each line possesses more  
269 than one transposon insertion within the genome, with up to 10 Tos17 insertions per line  
270 (Miyao *et al.*, 2003). Not every insertion has a phenotypic manifestation, but in some cases, a  
271 single insertion can cause multiple aberrant phenotypes. In fact, almost half of the lines showed  
272 more than one phenotype (Miyao *et al.*, 2007). Because multiple Tos17 insertions within the  
273 genome of one line exist establishing a correlation between insertion and phenotype is not  
274 straight forward. However, if two or more lines have independent insertions in the same gene  
275 and exhibit the same/similar phenotype, disruption of the gene is likely linked to the phenotype.  
276 To facilitate detection of the most common phenotype associated with the insertion a more  
277 fuzzy match was performed – the 49 phenotypes were split into more general categories:  
278 reproductive timing, reproductive fertility, reproductive seed, reproductive organ, vegetative,  
279 lethal and dwarf (Table S6).

280 The insertion sites derived from all the lines were compared with exonic positions of genes.  
281 For each gene, all the lines which had an insertion within exons of the gene were extracted, and  
282 the most common phenotype and phenotype category (reproductive timing, reproductive  
283 fertility, reproductive seed, reproductive organ, vegetative, lethal and dwarf) were recorded. In  
284 total, 3,252 genes could be assigned at least one line with phenotype, and for 1,295 the most  
285 common phenotype was categorized as reproductive.

#### 286 **Sequence homology analysis**

287 Sexual reproduction is a process conserved in eukaryotes, with a number of genes involved in  
288 core processes, sharing sequence homology and conserved functions even among distantly  
289 related species (Schurko and Logsdon, 2008, Wallace *et al.*, 2011, Gómez *et al.*, 2015). For

290 example, corresponding genes involved in anther and pollen development have been found  
291 (Gómez *et al.*, 2015). Therefore, the functionality of *A. thaliana* homologs can help in the  
292 prediction of roles of rice genes. The sequences of rice and *A. thaliana* genes were compared  
293 and GO annotation was transferred from *A. thaliana* genes to best rice gene matches.  
294 Additionally, the GO terms were compared with the list of key reproductive terms constructed  
295 during functional annotation of the co-expression network. Genes which were annotated with  
296 at least one GO term which contained a key word/term were annotated as associated with sexual  
297 reproduction.

### 298 **Sequence diversity analysis**

299 Rice has the most extensive single nucleotide polymorphism database of any plants  
300 (Alexandrov *et al.*, 2015). The database lists ~20 million SNPs discovered using genomic data  
301 from ~3000 lines. Lower SNP density across genomic regions is associated with either  
302 purifying selection or selective sweeps (Wollstein and Stephan, 2015). An analysis of SNP  
303 diversity across the rice genome revealed that genes associated with regulation of transcription  
304 have lower than average sequence diversity (Tatarinova *et al.*, 2016) and transcription factor  
305 activity plays a key role in the control of biological processes. Furthermore, the known sexual  
306 reproduction master regulators (Table 2) were enriched in genes with low sequence diversity  
307 (Fisher exact,  $p < 0.05$ ). The functional lncRNAs were also shown to have lower rates of  
308 evolution compared to non-functional ones (Wen *et al.*, 2016). Overall, 21.23% genes were  
309 identified as low diversity.

### 310 **Predicting gene's potential for involvement in sexual reproduction**

311 We devised a two-step approach in which we first apply Multi Criteria Decision Analysis  
312 (MCDA) based Process Involvement score (PI score) and then use the top scoring genes as the  
313 training dataset for Naïve Bayes classifier, which is in turn applied to the full set of genes. The  
314 combination of the classification provided by Naïve Bayes and the PI score ranking allows  
315 identification of most confident candidate genes involved in sexual reproduction.

#### 316 *Process Involvement (PI) gene score*

317 The Process Involvement (PI) score is a single metric designed to measure gene's potential for  
318 involvement in a biological process, in this case sexual reproduction. The score is inspired by  
319 Multi Criteria Decision Analysis (MCDA), a decision-making strategy used in a variety of  
320 settings from financial and urban planning to ecological risk assessment and medical  
321 diagnostics (DCLG, 2009, Adunlin *et al.*, 2015, Linkov *et al.*, 2015). MCDA involves

322 combining multiple lines of evidence from different sources to aid complex problem solving.  
323 A general feature of MCDA is: 1. scoring of the options 2. weighting of the scores depending  
324 on their perceived importance. A similar approach can be used to evaluate the potential of  
325 gene's involvement in biological process and prioritise genes with features of interest, given  
326 diverse evidentiary support including expression, sequence homology, and diversity data. (Fig.  
327 1, Table 1).

328 Seven features are taken into consideration and combined to provide a single score. The score  
329 components were not weighted equally, ET, P and H contributing more to the score than CP,  
330 CF, D, and EV (Table 1, Experimental Procedures, Note S2). Overall, the genes which scored  
331 most favourably were: highly expressed in reproductive tissues, their disruption resulted in  
332 reproductive phenotype, had homologues in *A. thaliana* annotated with functions in  
333 reproduction, were highly connected in co-expression networks, had low sequence diversity  
334 among rice lines. The score for protein coding genes and lincRNAs differed slightly. For  
335 lincRNAs the homology term is ignored, as lincRNAs show little sequence conservation across  
336 species and very few have functional annotation. The PI score was calculated for all rice genes,  
337 resulting in a continuous distribution of scores (Fig. S3) and the genes were ordered by  
338 descending PI score. The highest ranking (top scoring) genes were considered to have a high  
339 potential for involvement in sexual reproduction.

340 *Using top scoring PI genes as training dataset and choosing the optimal machine learning*  
341 *classifier*

342 The high and low PI scoring coding and lincRNA genes can be then used as training data for a  
343 machine learning classification algorithm. The training dataset was composed of 200 coding  
344 and 100 lincRNA top scoring genes (as an example of genes involved in sexual reproduction –  
345 positive training dataset) and a random selection of 500 coding and 250 lincRNA genes from  
346 the bottom 95% of the ranking (as an example of genes not involved in sexual reproduction –  
347 negative training dataset). The GO enrichment analysis has shown the top 200 coding genes to  
348 be highly enriched in functions related to sexual reproduction (Table S7), while the selection  
349 of 500 genes from the bottom 95% showed no such enrichment (Table S8).

350 Three types of classifiers were tested (1) Naïve Bayes classifier, (2) Classification Tree, (3)  
351 Logistic Regression. A machine learning based classifier essentially performs the following  
352 task: 'Given a set of genes A, find all the genes with similar properties in a larger set B.' The  
353 classifiers were evaluated with respect to Matthews correlation coefficient (MCC), sensitivity

354 and specificity (Fig 2a). Receiver operating characteristic (ROC) curves were also generated  
355 by plotting sensitivity against (1 – specificity) and the area under the curve (AUC) was  
356 compared (Fig 2a). To achieve a more balanced positive to negative set ratio, the negative  
357 training set was composed of randomly selected subset of a larger number of genes and the  
358 effect of the repeated selection on classifier performance was also tested (Fig 2a, Notes S3-S5).  
359 Overall, the Naïve Bayes classifier outperformed the other two other classifiers across all the  
360 metrics for both coding and lincRNA genes and was therefore chosen to perform the analysis  
361 (Fig 2b and Fig 2c). The superior performance of Naïve Bayes classifier for biological  
362 classification purposes using heterogenous data has been previously observed (Troyanskaya *et*  
363 *al.*, 2003, Bradford *et al.*, 2010, Sperschneider *et al.*, 2016). Additionally, Naïve Bayes  
364 classifier was shown to be not sensitive to the size of negative training set (Kurczab *et al.*,  
365 2014, Kurczab and Bojarski, 2017) alleviating the potential effects of introducing artificial  
366 positive to negative training set ratio (Libbrecht and Noble, 2015).

#### 367 *Applying Naïve Bayes classifier*

368 Naïve Bayes Classifier identified, 2,275 coding genes and 748 lincRNAs as involved in sexual  
369 reproduction (the genes identified by Naïve Bayes Classifier as involved in sexual reproduction  
370 were termed SexRep genes, Table S9). Again, GO analysis of SexRep genes showed strong  
371 enrichment of genes associated with sexual reproduction (Table S10). The number of genes  
372 involved in different reproduction related processes improved markedly when comparing the  
373 top 200 genes identified by PI score and the genes identified by Naïve Bayes classifier (for  
374 example, 54 and 347 genes respectively annotated as possibly involved in flower development;  
375 addition of 293 genes, addition of ~51 genes would be expected at random). The SexRep genes  
376 include 198 genes for which Tos17 mutant phenotypes were available (162 coding genes and  
377 36 lincRNAs) (Fig. 2d). The four most common phenotypes were low fertile, sterile,  
378 germination rate and dwarf. This is consistent with observations that fertility and dwarf  
379 phenotypes are highly correlated (Miyao *et al.*, 2007).

#### 380 *Testing MCRiceRepGP predictions*

381 The classifier has been trained to prioritize certain features including: high expression in  
382 reproductive tissues, homology to know *A. thaliana* proteins involved in reproduction and high  
383 connectivity in co-expression network. We have compared the results with a set of genes  
384 known to be crucial in rice sexual reproduction (Gómez *et al.*, 2015, Shi *et al.*, 2015a), which  
385 broadly fit into the criteria set while training the classifier (Test Set 1, Table 2). The genes

386 represent a number of functional classes, including transcription factors, protein kinase, DNA  
387 de-methylase, Polycomb group protein and an lincRNA mi-RNA sponge (Nonomura *et al.*,  
388 2003, Ono *et al.*, 2012, Yun *et al.*, 2013, Pan *et al.*, 2014, Wang *et al.*, 2017) and are involved  
389 in diverse processes including floral organ identity specification, floral patterning,  
390 sporogenesis, gamete fusion, endosperm and embryonic development. The method has  
391 classified all of those genes, including the lincRNA, as involved in reproduction. Additionally,  
392 we have tested the results against a database of 781 genes implicated to be involved in sexual  
393 reproduction (Test Set 2). Twenty eight percent of the Test Set 2 genes overlapped with SexRep  
394 genes and such an overlap is unlikely to occur by chance alone (permutation test,  $p < 0.01$ ),  
395 confirming the suitability of the method for discovery of genes associated with sexual  
396 reproduction. Disregarding genes found in Test Sets 1 and 2 the method identified 2,060 coding  
397 and 747 lincRNA novel genes potentially involved in sexual reproduction.

## 398 **Characterization of genes predicted to be involved in sexual reproduction**

### 399 **Overall properties of genes predicted to be involved in sexual reproduction**

400 The 3,023 SexRep genes (2,275 protein-coding genes and 748 lincRNAs) were analysed in  
401 more detail. Both coding and lincRNA SexRep genes showed an even distribution across  
402 chromosomes (Fig. 3a). The protein coding genes had higher overall expression levels when  
403 compared to lincRNAs, which is consistent with observations in rice and other plant species  
404 (Fig. 3b and Fig. 3c) (Zhang *et al.*, 2014, Wang *et al.*, 2015a). Analysis of tissue expression  
405 patterns of coding and lincRNA SexRep genes revealed that the highest proportion of genes  
406 had peak expression in egg and sperm cells respectively (Fig. 3b and Fig. 3c). Molecular  
407 function enrichment (Table S11) of the protein coding-genes showed them to be involved in  
408 protein binding, transcription factor activity, kinase activity and chromatin binding. Overall,  
409 54.4% of the protein SexRep genes had no detectable similarity to *A. thaliana* genes involved  
410 in sexual reproduction, but 59.2% were found in communities annotated with reproductive  
411 functions. Similarly, 61% of lincRNAs were found in communities annotated with  
412 reproductive functions (Fig 2c).

### 413 **Top candidate SexRep genes have diverse functional annotation**

414 The SexRep genes can be ranked by PI score to identify most confident candidates. Top 10  
415 SexRep genes (as ranked by PI score) were investigated in more detail (Table 3). Analysis of  
416 *A. thaliana* homologs suggests a diversity of molecular functions including protein kinases,  
417 transcription factor, UDP-glucose phosphorylase, histidinol dehydrogenase and ferritin. The



418 genes appear to be involved in a range of processes from floral organ specification, cell cycle  
419 regulation, pollen maturation to pollen tube guidance. The most common phenotype found  
420 among the top ten genes was low fertility. To our knowledge four of the genes  
421 (LOC\_Os01g68870, LOC\_Os02g02560, LOC\_Os06g08380 and LOC\_Os12g10540) have  
422 already been characterized, confirming their involvement in sexual reproduction and influence  
423 on fertility (Yao *et al.*, 2017).

#### 424 **SexRep genes have distinct tissue expression profiles**

425 Genes which show unique or high activity in a given tissue are considered to be likely to  
426 contribute to the relevant biological processes (Wen *et al.*, 2016, Boyle *et al.*, 2017, Golicz *et*  
427 *al.*, 2018b). We investigated overall expression profiles of SexRep genes which show peak  
428 expression in a given tissue/cell type (Fig. 4a). Principal components analysis (PCA) shows  
429 clear clustering of both coding and lincRNA genes with peak expression in flower bud/flower,  
430 egg cells, pollen sperm cells and vegetative cells (Fig. 4a) suggesting that the genes may be  
431 involved in common biological processes. Protein coding SexRep genes have overall lower  
432 expression specificities (show broad expression across tissues/cell types), when compared to  
433 lincRNAs (lincRNAs are expressed in a limited number of tissues/cell types, Fig. 4b), which  
434 again is consistent with observations in other species (Golicz *et al.*, 2018a). For example, sperm  
435 cell SexRep protein-coding genes have one of the lowest median values of expression  
436 specificity index, while the lincRNA genes have the highest.

#### 437 **Expression profile of SexRep genes suggests genes involved in male and female fertility**

438 Sexual reproduction requires formation of reproductive structures including flower, anthers  
439 and pistils as well as successful male and female gametophyte development and fertilization.  
440 Defects which are sex specific will result in aberrant male or female fertility. We have  
441 investigated expression patterns of SexRep genes associated with fertility phenotype (Fig. 4c).  
442 Majority of the genes show sex-specific preferential expression. The genes associated with  
443 fertility phenotype show a clear split into three groups (1) genes with preferential expression  
444 in anthers and vegetative cells (2) genes with preferential expression in sperm cells and (3)  
445 genes with preferential expression in pistils and egg cells. Genes with preferential expression  
446 in male or female organs are potential contributors to sex-specific fertility.



447 **A subset of SexRep genes shows population differentiation between *japonica* and *indica***  
448 **genotypes**

449 In rice, there is an ancient and well-established divergence between two subspecies *japonica*  
450 and *indica* and the subpopulations are easily distinguishable based on their DNA sequence  
451 (Garris *et al.*, 2005). The subspecies also display phenotypic differences. For example, the  
452 *indica* lines being overall more heat tolerant than the *japonica* lines (Jagadish *et al.*, 2007, Zhao  
453 *et al.*, 2016), although heat tolerant lines exist in both sub-populations. Heat stress is known to  
454 reduce rice fertility with flowering (anthesis and fertilization) being the most susceptible stages  
455 of development (Jagadish *et al.*, 2007). The large polymorphism database available for rice  
456 (Alexandrov *et al.*, 2015) allows detailed genome-wide studies of differences between  
457 subspecies. The pairwise differentiation index (Fst) can be calculated between subpopulations,  
458 used to pinpoint regions of highest sequence diversity and find loci contributing to differences  
459 in phenotypes (Zhou *et al.*, 2015). In total, 288 SexRep protein coding genes fell within  
460 genomic regions corresponding to the top 5% of Fst values calculated between *japonica* and  
461 *indica* genotypes (Fig. 3a). GO enrichment analysis of those genes points to significant  
462 enrichment of genes associated with anther dehiscence ( $p = 0.0048$ , Table S12 and Table S13).  
463 Poor anther dehiscence is in turn known to be the leading cause of spikelet sterility induced by  
464 high temperatures due to poor efficiency of pollen delivery to stigma (Jagadish *et al.*, 2010,  
465 Zhao *et al.*, 2016). High differentiation of anther dehiscence related genes is consistent with  
466 observations of differential heat tolerance of *indica* and *japonica* sub-species.

467 **Several SexRep genes overlap loci associated with sterility in rice**

468 The method used for detection of SexRep genes can also be used to enhance findings of genome  
469 wide association studies (GWAS). GWAS have been successfully used to uncover genomic  
470 regions containing loci associated with agronomic traits (Huang *et al.*, 2010, Yano *et al.*, 2016).  
471 Although high density SNP maps give good resolution to GWAS studies, usually several  
472 candidate genes within the region of interest are identified (Dingkuhn *et al.*, 2017). Usage of  
473 additional lines of evidence such as the ones used for identification of SexRep genes can help  
474 point to more confident candidates within the sections of the genome identified by GWAS. We  
475 have compared the genomic locations of recently identified SNPs linked to heat stress  
476 associated sterility in rice (Dingkuhn *et al.*, 2017) with coordinates of SexRep genes and  
477 identified six genes potentially related to sterility (Table S14). The number of SexRep genes  
478 found in vicinity of sterility associated SNPs (closer to the SNP than any other gene) was higher  
479 than it would be expected by chance (Chi Square,  $p < 0.01$ ).

## 480 **Discussion**

481 Despite considerable research efforts genes controlling sexual reproduction in plants remain  
482 enigmatic. Computational biology approaches can provide new insights by combining and  
483 analysing large-scale data from a number of sources, including genomic, transcriptomic and  
484 mutational datasets. The main challenge is the effective integration of all the information  
485 available. In this study, Process Involvement (PI) score and Naïve Bayes Classifier were  
486 applied to identify genes involved in sexual reproduction. MCRiceRepGP depends on seven  
487 features which describe the gene in terms of expression profile, biological network  
488 connectivity, homology with known sexual reproduction regulators and overall sequence  
489 diversity. MCRiceRepGP was applied to protein coding genes as well as non-coding RNA loci  
490 and identified three thousand protein coding genes and lincRNA loci involved in sexual  
491 reproduction. Analysis of all protein coding genes predicted to be involved in sexual  
492 reproduction (SexRep genes) highlighted genes involved in protein binding, transcription  
493 factor and kinase activity. The most common mutant phenotype associated with both coding  
494 and lincRNA SexRep genes was low fertility. The top SexRep protein coding genes had diverse  
495 functional annotations and are implicated in processes from floral organ specification, pollen  
496 development to pollen tube guidance. The genes identified are valuable resource providing  
497 potential targets for further experiments, including many long non-coding RNAs. Previous  
498 studies have shown long non-coding RNAs to play active roles in reproductive processes and  
499 the candidates identified in this study can open new avenues for rice research.

500 In this analysis MCRiceRepGP was parametrized to favour genes highly or specifically  
501 expressed in reproductive organs and with sequence homology to *A. thaliana* genes. However,  
502 alternative parameters can be chosen depending on the experimental goals. Other mutant lines  
503 can also be utilized. Recently a comprehensive library of neutron mutants became available,  
504 although no phenotypes have yet been recorded (Li *et al.*, 2017). Additionally, looking at  
505 individual components of the PI score can also point to genes of interest. For instance, looking  
506 only at genes which do not have homologs in *A. thaliana*, could help uncover rice specific  
507 regulators.

508 The method can be used in conjunction with other genome wide analyses. A number of  
509 genome-wide screens which help identify genomic regions associated with traits exist. These  
510 include genome-wide association studies (GWAS) to identify loci linked to traits of interest or  
511 calculation of fixation index (Fst) between sub-populations and identification of genomic

512 regions with high and low differentiation. However, regions identified usually contain multiple  
513 genes, and it is not clear which one affects the trait. For example, in a recent GWAS study  
514 genes within  $\pm 100\text{kb}$  of associated polymorphism were considered (Dingkuhn *et al.*, 2017)  
515 and the  $F_{st}$  values are also calculated for  $\sim 100\text{kb}$  windows (Zhou *et al.*, 2015). Often sequence  
516 homology only is used, but combining multiple lines of evidence can give more confident  
517 candidate gene predictions. Comparison of genome coordinates of SexRep genes against  
518 regions of high differentiation between *japonica* and *indica* genotypes revealed  
519 overrepresentation of genes associated with pollen release from anther, while comparison with  
520 GWAS data identified six genes potentially related to sterility.

521 A web application which implements MCRiceRepGP has been made available (Fig. 5). The  
522 application allows building of new classifiers by varying of PI score parameters, key words  
523 and classifier features. The results can be browsed online and are available for download.

## 524 **Conclusion**

525 We have developed MCRiceRepGP – a method which combines evidence from heterogenous  
526 data sources for identification of novel genes involved in rice sexual reproduction. An easy to  
527 use web application has been made available and allows building of different classifiers.  
528 Additionally, for this study an updated rice genome annotation has been generated using deep  
529 sequencing data from reproductive tissues and cell types. The methodology developed, the  
530 putative reproduction associated genes and especially lincRNAs identified using  
531 MCRiceRepGP as well as the new rice genome annotation provide a valuable resource for  
532 further studies of rice sexual reproduction. Identification of previously unannotated genes from  
533 sexual reproduction specific tissues highlights the importance of including expression data  
534 from specialized organs and low abundance cell types in the genome annotation efforts. The  
535 novel sexual reproduction associated genes and lincRNAs described in the study provide  
536 targets for future research efforts. The method described may become an inspiration and an  
537 example of how different types of data can be integrated to predict most confident candidate  
538 genes and future research targets.

## 539 **Acknowledgements**

540 This research was supported by Melbourne Bioinformatics at the University of Melbourne,  
541 project UOM0033. The research was supported by ARC Discovery grant DP0988972 and the  
542 University of Melbourne McKenzie Postdoctoral Fellowship.

## 543 **Authors' contributions**

544 AAG designed and performed the experiments, wrote the manuscript. MBS conceived  
545 research, designed the experiments, wrote the manuscript. PLB conceived research.

546 Table 1 Features taken into account when evaluating the PI score.

| Feature                      | General feature description                                                             | As applied for identification of sexual reproduction genes                                                     | Possible values   | Parameter (feature weight) | Parameter values |
|------------------------------|-----------------------------------------------------------------------------------------|----------------------------------------------------------------------------------------------------------------|-------------------|----------------------------|------------------|
| Expression type (ET)         | Is the highest expression recorded in a relevant tissue type?                           | Is the highest expression recorded in reproductive tissue?                                                     | 0 – no<br>1 – yes | $\alpha$                   | 0.6              |
| Phenotype category (P)       | Is the most common mutant phenotype consistent with the highest expression tissue type? | Is the most common phenotype associated with the transposable element insertion in the gene reproductive only? | 0 – no<br>1 – yes |                            |                  |
| Sequence homology (H)        | Is the homologous <i>A. thaliana</i> gene annotated with relevant functions?            | Is the homologous <i>A. thaliana</i> gene annotated with reproductive function?                                | 0 – no<br>1 – yes | $\beta$                    | 0.6              |
| Community participation (CP) | Is the gene found within a community in co-expression network?                          | Is the gene found within a community in co-expression network?                                                 | 0 – no<br>1 – yes | $\gamma$                   | 0.4              |
| Community function (CF)      | Does the gene belong to a community annotated with relevant functions?                  | Does the gene belong to a community annotated with reproductive function?                                      | 0 – no<br>1 – yes | $\delta$                   | 0.3              |
| Sequence diversity (D)       | Does the gene display low sequence diversity within the species?                        | Does the gene display low sequence diversity within the species?                                               | 0 – no<br>1 – yes | $\epsilon$                 | 0.2              |
| Expression value (EV)        | The FPKM value for the gene in the tissue with highest expression                       | The FPKM value for the gene in the tissue with highest expression                                              | EV                | $\zeta$                    | 0.1              |

547

548

549 Table 2 PI scores for known genes involved in sexual reproduction. Rep – predicted to be involved in sexual reproduction by MCRiceRepGP.

550 MCRiceRepGP was not tested on LDMAR, a lincRNA known to be involved in rice sexual reproduction as it was not found in the annotation.

| Gene name  | Gene ID           | MSU-RAP Locus ID | Function             | ET | P | H   | CP | CF | D | Log1p(EV) | PI    | MCRiceRepGP |
|------------|-------------------|------------------|----------------------|----|---|-----|----|----|---|-----------|-------|-------------|
| MADS3      | OSATST00001046    | LOC_Os01g10504   | Transcription factor | 1  | 0 | 1   | 0  | 0  | 1 | 5.16      | 1.316 | Rep         |
| MADS58     | OSATST00036993    | LOC_Os05g11414   | Transcription factor | 1  | 0 | 1   | 1  | 1  | 0 | 4.85      | 1.785 | Rep         |
| MADS15     | OSATST00045376    | LOC_Os07g01820   | Transcription factor | 1  | 0 | 1   | 1  | 0  | 0 | 3.68      | 1.368 | Rep         |
| MADS1      | OSATST00025799    | LOC_Os03g11614   | Transcription factor | 1  | 0 | 1   | 0  | 0  | 1 | 5.21      | 1.321 | Rep         |
| DL         | OSATST00025795    | LOC_Os03g11600   | Transcription factor | 1  | 0 | 1   | 0  | 0  | 1 | 4.85      | 1.285 | Rep         |
| MSP1       | OSATST00006904    | LOC_Os01g68870   | Kinase/Signalling    | 1  | 1 | 1   | 1  | 1  | 1 | 2.41      | 2.341 | Rep         |
| OsRos1a    | OSATST00001213    | LOC_Os01g11900   | DNA demethylation    | 1  | 0 | 1   | 1  | 0  | 1 | 3.71      | 1.571 | Rep         |
| OsFIE2     | OSATST00049934    | LOC_Os08g04270   | Polycomb silencing   | 1  | 0 | 1   | 1  | 1  | 0 | 3.54      | 1.654 | Rep         |
| HAP2       | OSATST00037441    | LOC_Os05g18730   | Gamete fusion        | 1  | 0 | 1   | 1  | 1  | 0 | 4.55      | 1.755 | Rep         |
| Osa-eTM160 | NC_OSATST00025950 | N/A              | miRNA sponge         | 1  | 0 | N/A | 1  | 0  | 1 | 2.02      | 0.802 | Rep         |

551

552

553 Table 3 Top ten SexRep genes with highest PI scores.

|        | Gene ID        | MSU-RAP Locus ID | PI score | Arabidopsis homolog | Arabidopsis protein name | Arabidopsis protein function/mutant phenotype                                                                                                                                                                                                                                                     | Confirmed function in rice                                                                                                                                                                                   | Rice mutant phenotype |
|--------|----------------|------------------|----------|---------------------|--------------------------|---------------------------------------------------------------------------------------------------------------------------------------------------------------------------------------------------------------------------------------------------------------------------------------------------|--------------------------------------------------------------------------------------------------------------------------------------------------------------------------------------------------------------|-----------------------|
| Coding | OSATST00018594 | LOC_Os02g02560   | 2.702    | AT5G17310           | UGP2                     | UDP-glucose phosphorylase [TAIR website (Berardini <i>et al.</i> , 2015)].                                                                                                                                                                                                                        | Preferentially expressed in pollen and plays key role during pollen maturation (Mu <i>et al.</i> , 2009). Shows differential expression in varieties differing in male fertility (Pan <i>et al.</i> , 2014). | Sterile               |
|        | OSATST00027308 | LOC_Os03g24170   | 2.52     | AT3G56960           | PIP5K4                   | Phosphatidylinositol-4-phosphate 5-kinase activity. Key role in pollen tip growth. Overexpression of this gene leads to altered pollen tube morphology [TAIR website].                                                                                                                            |                                                                                                                                                                                                              | Low fertile           |
|        | OSATST00041382 | LOC_Os06g08380   | 2.513    | AT2G13680           | CALS5                    | Responsible for the synthesis of callose deposited at the primary cell wall of meiocytes, tetrads and microspores. Required for exine layer formation during microgametogenesis and for pollen viability. Highest expression in meiocytes, tetrads, microspores and mature pollen [TAIR website]. | OsGSL5 plays essential role in rice male fertility (Shi <i>et al.</i> , 2015b).                                                                                                                              | Low fertile           |
|        | OSATST00001380 | LOC_Os01g13190   | 2.47     | AT5G63890           | HISN8                    | Histidinol dehydrogenase. Identified in screen of male gametophytic mutants [TAIR website].                                                                                                                                                                                                       |                                                                                                                                                                                                              | Low fertile           |



|            |                   |                |       |           |      |                                                                                                                                                              |                                                                                                                                                                     |                  |
|------------|-------------------|----------------|-------|-----------|------|--------------------------------------------------------------------------------------------------------------------------------------------------------------|---------------------------------------------------------------------------------------------------------------------------------------------------------------------|------------------|
|            | OSATST00023893    | LOC_Os02g53720 | 2.447 | AT2G26330 | ER   | Homologous to receptor protein kinases.<br>Involved in specification of organs originating from the shoot apical meristem [TAIR website].                    |                                                                                                                                                                     | Low fertile      |
|            | OSATST00015635    | LOC_Os12g10540 | 2.407 | AT4G18960 | AG   | Floral homeotic gene encoding a MADS domain transcription factor [TAIR website].<br>Specifies floral meristem and carpel and stamen identity [TAIR website]. | Controls ovule identity in rice (Dreni <i>et al.</i> , 2007).<br>Involved in meristem determinacy (Dreni <i>et al.</i> , 2011).                                     | Low fertile      |
|            | OSATST00018657    | LOC_Os02g03060 | 2.384 | AT3G48750 | CDC2 | A-type cyclin-dependent kinase.<br>Loss of function phenotype has reduced fertility [TAIR website].                                                          |                                                                                                                                                                     | Low fertile      |
|            | OSATST00010933    | LOC_Os11g01530 | 2.372 | AT2G40300 | FER4 | Ferritins are essential to protect cells against oxidative damage, but they do not constitute the major iron pool [TAIR website].                            |                                                                                                                                                                     |                  |
|            | OSATST00006904    | LOC_Os01g68870 | 2.341 | AT5G07280 | EMS1 | A putative leucine-rich repeat receptor protein kinase.<br>Controls somatic and reproductive cell fates in anther [TAIR website].                            | Necessary to restrict the number of cells entering into male and female sporogenesis and to initiate anther wall formation in rice (Nonomura <i>et al.</i> , 2003). | Sterile          |
|            | OSATST00035108    | LOC_Os04g52450 | 2.334 | AT3G22200 | HER1 | Mediates pollen tube guidance [TAIR website].                                                                                                                |                                                                                                                                                                     | Low fertile      |
| Non-coding | NC_OSATST00049879 |                | 1.494 | N/A       | N/A  | N/A                                                                                                                                                          | N/A                                                                                                                                                                 | Low fertile      |
|            | NC_OSATST00032850 | LOC_Os04g31740 | 1.466 | N/A       | N/A  | N/A                                                                                                                                                          | N/A                                                                                                                                                                 | Low fertile      |
|            | NC_OSATST00036949 | LOC_Os05g10910 | 1.416 | N/A       | N/A  | N/A                                                                                                                                                          | N/A                                                                                                                                                                 | Germination rate |
|            | NC_OSATST00000613 | LOC_Os01g06620 | 1.326 | N/A       | N/A  | N/A                                                                                                                                                          | N/A                                                                                                                                                                 |                  |
|            | NC_OSATST00032898 | LOC_Os04g32180 | 1.293 | N/A       | N/A  | N/A                                                                                                                                                          | N/A                                                                                                                                                                 | Low fertile      |
|            | NC_OSATST00056573 |                | 1.293 | N/A       | N/A  | N/A                                                                                                                                                          | N/A                                                                                                                                                                 | Low fertile      |

|  |                   |                |       |     |     |     |     |             |
|--|-------------------|----------------|-------|-----|-----|-----|-----|-------------|
|  | NC_OSATST00041036 |                | 1.29  | N/A | N/A | N/A | N/A | Low fertile |
|  | NC_OSATST00042178 |                | 1.284 | N/A | N/A | N/A | N/A | Low fertile |
|  | NC_OSATST00036564 |                | 1.283 | N/A | N/A | N/A | N/A | Vivipary    |
|  | NC_OSATST00038962 | LOC_Os05g36994 | 1.261 | N/A | N/A | N/A | N/A |             |

554

555 Fig. 1. **MCRiceRepGP method overview.** Seven features (ET – expression type, P –  
556 phenotype category, H – sequence homology, CP – community participation, CF – community  
557 function, D – sequence diversity, EV – expression value) are used when evaluating a gene’s  
558 potential for involvement in a biological process. The features are scored and weighted and the  
559 Process Involvement (PI) score is calculated. The top and bottom scoring genes are used as  
560 positive and negative training set to build Naïve Bayes classifiers for coding and lincRNA genes.  
561 The classifiers are then used to identify a final set of genes involved in a given process. The  
562 values of parameters used to identify genes involved in sexual reproduction are presented in  
563 square brackets.

564 Fig. 2. **Comparison of the tested classifiers and the characteristics of the final Naïve Bayes**  
565 **classifier used for the analysis.** (a) Three popular classifiers were tested: Naïve Bayes  
566 classifier, Classification Tree, and Logistic Regression. The performance measures used to  
567 assess the classifiers were: area under the receiver operating characteristic (ROC) curve (AUC)  
568 – interpreted as the ability of the classifier to distinguish between the two cases, MCC –  
569 Matthews correlation coefficient, sensitivity and specificity. The Naïve Bayes classifier was  
570 the top performing algorithm. The positive training sets were the top 200 and 100 coding and  
571 lincRNA genes as ranked by PI score. The negative training sets were the 500 and 250 genes  
572 randomly drawn from the bottom 95% of PI score gene ranking. In total, 200 negative training  
573 sets for coding and lincRNA genes were drawn and 5-fold cross validation for each negative  
574 set was performed (3×5×200 classifiers built for coding and lincRNAs genes). (b) The ROC  
575 curves along with other performance measures for the final Naïve Bayes classifiers for coding  
576 genes (200 top PI scoring coding genes as positive training set, random selection of 500 coding  
577 genes from the bottom 95% of PI score gene ranking as negative training set) and lincRNA  
578 genes (100 top PI scoring lincRNA genes as positive training set, random selection of 250  
579 lincRNA genes from the bottom 95% of PI score gene ranking as negative training set). The  
580 performance of the classifiers was tested using 5-fold cross validation, the values provided are  
581 means. (c) Proportion of coding and lincRNA genes in positive training set, negative training  
582 set and final predicted SexRep genes which had value ‘1’ for the six binary features listed in  
583 Table 1 (ET – expression type, P – phenotype category, H – sequence homology, CP –  
584 community participation, CF – community function, D – sequence diversity). Vast majority of  
585 coding and lincRNA genes had peak expression in a reproductive tissue/cell type and belonged  
586 co-expression module(s). Many coding genes showed homology to known sexual reproduction  
587 regulators and had low sequence diversity. (d) Ten most common insertional mutant

588 phenotypes for coding and lincRNA SexRep genes. The most common phenotype was low  
589 fertility and sterility.

590 **Fig. 3. The landscape of SexRep genes.** (a) Circular plot presenting SexRep gene distribution  
591 along the rice genome. From the outside ring: (1) coding SexRep genes, (2) lincRNA SexRep  
592 genes, (3) Fst index between *japonica* and *indica* sub-populations, calculated for 100 kb  
593 overlapping windows with a step of 10kb, (4) SexRep genes falling within regions of 5%  
594 highest Fst values (5) SexRep genes overlapping sterility associated loci identified in GWAS.  
595 (b,c) Heatmaps presenting expression of SexRep genes across tissues/cell types. Coding genes  
596 have higher overall expression values. Many of the lincRNA genes are expressed in sperm  
597 cells. Pie charts on top of heatmaps summarize the number of genes with peak expression in a  
598 given tissue/cell type.

599 **Fig. 4. Overall expression patterns of SexRep genes with peak expression in a given**  
600 **tissue/cell type.** (a) PCA analysis of coding and lincRNA gene expression values across  
601 tissues, each point corresponds to a gene and is coloured according to tissue/cell type in which  
602 the gene had peak expression value. Genes with common peak expression tissue/cell type  
603 cluster together – show similar overall expression patterns, which suggests involvement in  
604 common pathways/biological processes. (b) The box plots present tissue specificity index  
605 (*Tau*) of genes having highest expression point in a given tissue/cell type. Difference between  
606 coding and lincRNA genes can be observed. For example, the protein coding genes with peak  
607 expression in sperm cells have the lowest tissue expression specificities, while the lincRNA  
608 genes have the highest. The nested nature of sampling (for example, sperm cells are found  
609 within anthers, which in turn are found within flowers) could affect specificity calculations.  
610 Therefore, specificity indices were calculated twice, first using all samples (classic) and then  
611 adjusting for sample structure (adjusted). However, in both cases similar patterns were  
612 observed. (c) Heatmap presenting expression patterns of SexRep genes associated with fertility  
613 phenotype. The genes show sex-specific expression.

614 **Fig. 5. Screen shot of MCRiceRepGP web app results.** The panel on the left side allows the  
615 user to control gene type, key words, PI score parameters and features to be included in the  
616 classifier. Results are displayed on the right-side panel. Results include classifier statistics,  
617 classifier ROC curve, control classifier ROC curve and the table with the final results.

## 618 References

- 619 **Acharya, L., Judeh, T. and Zhu, D.** (2012) A survey of computational approaches to  
620 reconstruct and partition biological networks. In *Statistical and Machine Learning*  
621 *Approaches for Network Analysis*: John Wiley & Sons, Inc., pp. 1-43.
- 622 **Adunlin, G., Diaby, V., Montero, A.J. and Xiao, H.** (2015) Multicriteria decision analysis in  
623 oncology. *Health expectations : an international journal of public participation in*  
624 *health care and health policy*, **18**, 1812-1826.
- 625 **Alexa, A., Rahnenführer, J. and Lengauer, T.** (2006) Improved scoring of functional groups  
626 from gene expression data by decorrelating GO graph structure. *Bioinformatics*, **22**,  
627 1600-1607.
- 628 **Alexandrov, N., Tai, S., Wang, W., Mansueto, L., Palis, K., Fuentes, R.R., Ulat, Victor J.,**  
629 **Chebotarov, D., Zhang, G., Li, Z., Mauleon, R., Hamilton, Ruaraidh S. and**  
630 **McNally, K.L.** (2015) SNP-Seek database of SNPs derived from 3000 rice genomes.  
631 *Nucleic Acids Research*, **43**, D1023-D1027.
- 632 **Bargsten, J.W., Severing, E.I., Nap, J.-P., Sanchez-Perez, G.F. and van Dijk, A.D.J.**  
633 (2014) Biological process annotation of proteins across the plant kingdom. *Current*  
634 *Plant Biology*, **1**, 73-82.
- 635 **Berardini, T.Z., Reiser, L., Li, D., Mezheritsky, Y., Muller, R., Strait, E. and Huala, E.**  
636 (2015) The Arabidopsis information resource: making and mining the 'Gold Standard'  
637 annotated reference plant genome. *Genesis (New York, N.Y. : 2000)*, **53**, 474-485.
- 638 **Boyle, E.A., Li, Y.I. and Pritchard, J.K.** (2017) An expanded view of complex traits: from  
639 polygenic to omnigenic. *Cell*, **169**, 1177-1186.
- 640 **Bradford, J.R., Needham, C.J., Tedder, P., Care, M.A., Bulpitt, A.J. and Westhead, D.R.**  
641 (2010) GO-At: in silico prediction of gene function in *Arabidopsis thaliana* by  
642 combining heterogeneous data. *The Plant Journal*, **61**, 713-721.
- 643 **Buchfink, B., Xie, C. and Huson, D.H.** (2015) Fast and sensitive protein alignment using  
644 DIAMOND. *Nat Meth*, **12**, 59-60.
- 645 **Camacho, C., Coulouris, G., Avagyan, V., Ma, N., Papadopoulos, J., Bealer, K. and**  
646 **Madden, T.L.** (2009) BLAST+: architecture and applications. *BMC Bioinformatics*,  
647 **10**, 421-421.
- 648 **DCLG** (2009) Multi-criteria analysis: a manual. London: Department for Communities and  
649 Local Government.
- 650 **de Luis Balaguer, M.A., Fisher, A.P., Clark, N.M., Fernandez-Espinosa, M.G., Möller,**  
651 **B.K., Weijers, D., Lohmann, J.U., Williams, C., Lorenzo, O. and Sozzani, R.** (2017)  
652 Predicting gene regulatory networks by combining spatial and temporal gene  
653 expression data in Arabidopsis root stem cells. *Proceedings of the National Academy*  
654 *of Sciences*.
- 655 **Dingkuhn, M., Pasco, R., Pasuquin, J.M., Damo, J., Soulié, J.-C., Raboin, L.-M.,**  
656 **Dusserre, J., Sow, A., Manneh, B., Shrestha, S. and Kretschmar, T.** (2017) Crop-  
657 model assisted phenomics and genome-wide association study for climate adaptation  
658 of indica rice. 2. Thermal stress and spikelet sterility. *Journal of Experimental Botany*,  
659 **68**, 4389-4406.
- 660 **Dreni, L., Jacchia, S., Fornara, F., Fornari, M., Ouwerkerk, P.B.F., An, G., Colombo, L.**  
661 **and Kater, M.M.** (2007) The D-lineage MADS-box gene OsMADS13 controls ovule  
662 identity in rice. *The Plant Journal*, **52**, 690-699.
- 663 **Dreni, L., Pilatone, A., Yun, D., Erreni, S., Pajoro, A., Caporali, E., Zhang, D. and Kater,**  
664 **M.M.** (2011) Functional Analysis of All AGAMOUS Subfamily Members in Rice  
665 Reveals Their Roles in Reproductive Organ Identity Determination and Meristem  
666 Determinacy. *The Plant Cell*, **23**, 2850-2863.

- 667 **Droc, G., Ruiz, M., Larmande, P., Pereira, A., Piffanelli, P., Morel, J.B., Dievart, A.,**  
668 **Courtois, B., Guiderdoni, E. and Périn, C.** (2006) OryGenesDB: a database for rice  
669 reverse genetics. *Nucleic Acids Research*, **34**, D736-D740.
- 670 **Edwards, J.W. and Coruzzi, G.M.** (1990) Cell-specific gene expression in plants. *Annual*  
671 *Review of Genetics*, **24**, 275-303.
- 672 **Fu, Z., Yu, J., Cheng, X., Zong, X., Xu, J., Chen, M., Li, Z., Zhang, D. and Liang, W.**  
673 (2014) The rice basic helix-loop-helix transcription factor TDR INTERACTING  
674 PROTEIN2 is a central switch in early anther development. *The Plant Cell*, **26**, 1512-  
675 1524.
- 676 **Garris, A.J., Tai, T.H., Coburn, J., Kresovich, S. and McCouch, S.** (2005) Genetic  
677 Structure and Diversity in *Oryza sativa* L. *Genetics*, **169**, 1631-1638.
- 678 **Golicz, A.A., Singh, M.B. and Bhalla, P.L.** (2018a) LncRNAs in plant and animal sexual  
679 reproduction. *Trends in Plant Science*, **23**, 195-205.
- 680 **Golicz, A.A., Singh, M.B. and Bhalla, P.L.** (2018b) The long intergenic non-coding  
681 (lincRNA) landscape of the soybean genome. *Plant Physiology*.
- 682 **Gómez, J.F., Talle, B. and Wilson, Z.A.** (2015) Anther and pollen development: a conserved  
683 developmental pathway. *Journal of Integrative Plant Biology*, **57**, 876-891.
- 684 **Goodstein, D.M., Shu, S., Howson, R., Neupane, R., Hayes, R.D., Fazo, J., Mitros, T.,**  
685 **Dirks, W., Hellsten, U., Putnam, N. and Rokhsar, D.S.** (2012) Phytozome: a  
686 comparative platform for green plant genomics. *Nucleic Acids Research*, **40**, D1178-  
687 D1186.
- 688 **Hu, Y., Liang, W., Yin, C., Yang, X., Ping, B., Li, A., Jia, R., Chen, M., Luo, Z., Cai, Q.,**  
689 **Zhao, X., Zhang, D. and Yuan, Z.** (2015) Interactions of OsMADS1 with floral  
690 homeotic genes in rice flower development. *Molecular Plant*, **8**, 1366-1384.
- 691 **Huang, X., Wei, X., Sang, T., Zhao, Q., Feng, Q., Zhao, Y., Li, C., Zhu, C., Lu, T., Zhang,**  
692 **Z., Li, M., Fan, D., Guo, Y., Wang, A., Wang, L., Deng, L., Li, W., Lu, Y., Weng,**  
693 **Q., Liu, K., Huang, T., Zhou, T., Jing, Y., Li, W., Lin, Z., Buckler, E.S., Qian, Q.,**  
694 **Zhang, Q.-F., Li, J. and Han, B.** (2010) Genome-wide association studies of 14  
695 agronomic traits in rice landraces. *Nat Genet*, **42**, 961-967.
- 696 **Jagadish, S.V.K., Craufurd, P.Q. and Wheeler, T.R.** (2007) High temperature stress and  
697 spikelet fertility in rice (*Oryza sativa* L.). *Journal of Experimental Botany*, **58**, 1627-  
698 1635.
- 699 **Jagadish, S.V.K., Muthurajan, R., Oane, R., Wheeler, T.R., Heuer, S., Bennett, J. and**  
700 **Craufurd, P.Q.** (2010) Physiological and proteomic approaches to address heat  
701 tolerance during anthesis in rice (*Oryza sativa* L.). *Journal of Experimental Botany*, **61**,  
702 143-156.
- 703 **Jarillo, J.A. and Piñeiro, M.** (2011) Timing is everything in plant development. The central  
704 role of floral repressors. *Plant Science*, **181**, 364-378.
- 705 **Johnson, W.E., Li, C. and Rabinovic, A.** (2007) Adjusting batch effects in microarray  
706 expression data using empirical Bayes methods. *Biostatistics*, **8**, 118-127.
- 707 **Kang, Y.-J., Yang, D.-C., Kong, L., Hou, M., Meng, Y.-Q., Wei, L. and Gao, G.** (2017)  
708 CPC2: a fast and accurate coding potential calculator based on sequence intrinsic  
709 features. *Nucleic Acids Research*, **45**, W12-W16.
- 710 **Kim, D., Langmead, B. and Salzberg, S.L.** (2015) HISAT: a fast spliced aligner with low  
711 memory requirements. *Nat Meth*, **12**, 357-360.
- 712 **Kun, W., Xiaoju, P., Yanxiao, J., Yang, P., Yingguo, Z. and Li, S.** (2013) Gene, protein,  
713 and network of male sterility in rice. *Frontiers in Plant Science*, **4**, 92.
- 714 **Kurczab, R. and Bojarski, A.J.** (2017) The influence of the negative-positive ratio and  
715 screening database size on the performance of machine learning-based virtual  
716 screening. *PLoS ONE*, **12**, e0175410.



- 717 **Kurczab, R., Smusz, S. and Bojarski, A.J.** (2014) The influence of negative training set size  
718 on machine learning-based virtual screening. *Journal of Cheminformatics*, **6**, 32-32.
- 719 **Li, G., Jain, R., Chern, M., Pham, N.T., Martin, J.A., Wei, T., Schackwitz, W.S., Lipzen,**  
720 **A.M., Duong, P.Q., Jones, K.C., Jiang, L., Ruan, D., Bauer, D., Peng, Y., Barry,**  
721 **K.W., Schmutz, J. and Ronald, P.C.** (2017) The sequences of 1,504 mutants in the  
722 model rice variety Kitaake facilitate rapid functional genomic studies. *The Plant Cell*.
- 723 **Liao, Y., Smyth, G.K. and Shi, W.** (2014) featureCounts: an efficient general purpose  
724 program for assigning sequence reads to genomic features. *Bioinformatics*, **30**, 923-  
725 930.
- 726 **Libbrecht, M.W. and Noble, W.S.** (2015) Machine learning applications in genetics and  
727 genomics. *Nature Reviews Genetics*, **16**, 321.
- 728 **Lin, H., Yu, J., Pearce, S.P., Zhang, D. and Wilson, Z.A.** (2017) RiceAntherNet: a gene co-  
729 expression network for identifying anther and pollen development genes. *The Plant*  
730 *Journal*, **92**, 1076-1091.
- 731 **Linkov, I., Massey, O., Keisler, J., Rusyn, I. and Hartung, T.** (2015) From "Weight of  
732 Evidence" to quantitative data integration using Multicriteria Decision Analysis and  
733 Bayesian Methods. *ALTEX*, **32**, 3-8.
- 734 **Meyer, D.** (2017) Misc Functions of the Department of Statistics (e1071), TU Wien.
- 735 **Miyao, A., Iwasaki, Y., Kitano, H., Itoh, J.-I., Maekawa, M., Murata, K., Yatou, O.,**  
736 **Nagato, Y. and Hirochika, H.** (2007) A large-scale collection of phenotypic data  
737 describing an insertional mutant population to facilitate functional analysis of rice  
738 genes. *Plant Molecular Biology*, **63**, 625-635.
- 739 **Miyao, A., Tanaka, K., Murata, K., Sawaki, H., Takeda, S., Abe, K., Shinozuka, Y.,**  
740 **Onosato, K. and Hirochika, H.** (2003) Target site specificity of the Tos17  
741 retrotransposon shows a preference for insertion within genes and against insertion in  
742 retrotransposon-rich regions of the genome. *The Plant Cell*, **15**, 1771-1780.
- 743 **Moyroud, E. and Glover, B.J.** (2017) The Evolution of Diverse Floral Morphologies. *Current*  
744 *Biology*, **27**, R941-R951.
- 745 **Mu, H., Ke, J., Liu, W., Zhuang, C. and Yip, W.** (2009) UDP-glucose pyrophosphorylase2  
746 (OsUgp2), a pollen-preferential gene in rice, plays a critical role in starch accumulation  
747 during pollen maturation. *Chinese Science Bulletin*, **54**, 234.
- 748 **Niu, N., Liang, W., Yang, X., Jin, W., Wilson, Z.A., Hu, J. and Zhang, D.** (2013) EAT1  
749 promotes tapetal cell death by regulating aspartic proteases during male reproductive  
750 development in rice. *Nat Commun*, **4**, 1445.
- 751 **Nonomura, K.-I., Miyoshi, K., Eiguchi, M., Suzuki, T., Miyao, A., Hirochika, H. and**  
752 **Kurata, N.** (2003) The MSP1 gene is necessary to restrict the number of cells entering  
753 into male and female sporogenesis and to initiate anther wall formation in rice. *The*  
754 *Plant Cell*, **15**, 1728-1740.
- 755 **O'Leary, N.A., Wright, M.W., Brister, J.R., Ciufu, S., Haddad, D., McVeigh, R., Rajput,**  
756 **B., Robbertse, B., Smith-White, B., Ako-Adjei, D., Astashyn, A., Badretdin, A.,**  
757 **Bao, Y., Blinkova, O., Brover, V., Chetvernin, V., Choi, J., Cox, E., Ermolaeva,**  
758 **O., Farrell, C.M., Goldfarb, T., Gupta, T., Haft, D., Hatcher, E., Hlavina, W.,**  
759 **Joardar, V.S., Kodali, V.K., Li, W., Maglott, D., Masterson, P., McGarvey, K.M.,**  
760 **Murphy, M.R., O'Neill, K., Pujar, S., Rangwala, S.H., Rausch, D., Riddick, L.D.,**  
761 **Schoch, C., Shkeda, A., Storz, S.S., Sun, H., Thibaud-Nissen, F., Tolstoy, I., Tully,**  
762 **R.E., Vatsan, A.R., Wallin, C., Webb, D., Wu, W., Landrum, M.J., Kimchi, A.,**  
763 **Tatusova, T., DiCuccio, M., Kitts, P., Murphy, T.D. and Pruitt, K.D.** (2016)  
764 Reference sequence (RefSeq) database at NCBI: current status, taxonomic expansion,  
765 and functional annotation. *Nucleic Acids Research*, **44**, D733-D745.



- 766 **Obayashi, T., Hayashi, S., Saeki, M., Ohta, H. and Kinoshita, K.** (2009) ATTED-II  
767 provides coexpressed gene networks for Arabidopsis. *Nucleic Acids Research*, **37**,  
768 D987-D991.
- 769 **Ono, A., Yamaguchi, K., Fukada-Tanaka, S., Terada, R., Mitsui, T. and Iida, S.** (2012) A  
770 null mutation of ROS1a for DNA demethylation in rice is not transmittable to progeny.  
771 *The Plant Journal*, **71**, 564-574.
- 772 **Palla, G., Derenyi, I., Farkas, I. and Vicsek, T.** (2005) Uncovering the overlapping  
773 community structure of complex networks in nature and society. *Nature*, **435**, 814-818.
- 774 **Pan, Y., Li, Q., Wang, Z., Wang, Y., Ma, R., Zhu, L., He, G. and Chen, R.** (2014) Genes  
775 associated with thermosensitive genic male sterility in rice identified by comparative  
776 expression profiling. *BMC Genomics*, **15**, 1114.
- 777 **Pertea, M., Pertea, G.M., Antonescu, C.M., Chang, T.-C., Mendell, J.T. and Salzberg,  
778 S.L.** (2015) StringTie enables improved reconstruction of a transcriptome from RNA-  
779 seq reads. *Nat Biotech*, **33**, 290-295.
- 780 **Quinlan, A.R. and Hall, I.M.** (2010) BEDTools: a flexible suite of utilities for comparing  
781 genomic features. *Bioinformatics*, **26**, 841-842.
- 782 **Revelle, W.** (2017) psych: procedures for personality and psychological research. Evanston,  
783 Illinois, USA: Northwestern University.
- 784 **Rhee, S.Y. and Mutwil, M.** (2014) Towards revealing the functions of all genes in plants.  
785 *Trends in Plant Science*, **19**, 212-221.
- 786 **Schurko, A.M. and Logsdon, J.M.** (2008) Using a meiosis detection toolkit to investigate  
787 ancient asexual “scandals” and the evolution of sex. *BioEssays*, **30**, 579-589.
- 788 **Shi, J., Dong, A. and Shen, W.-H.** (2015a) Epigenetic regulation of rice flowering and  
789 reproduction. *Frontiers in Plant Science*, **5**, 803.
- 790 **Shi, X., Sun, X., Zhang, Z., Feng, D., Zhang, Q., Han, L., Wu, J. and Lu, T.** (2015b)  
791 GLUCAN SYNTHASE-LIKE 5 (GSL5) plays an essential role in male fertility by  
792 regulating callose metabolism during microsporogenesis in rice. *Plant and Cell  
793 Physiology*, **56**, 497-509.
- 794 **Sperschneider, J., Gardiner, D.M., Dodds, P.N., Tini, F., Covarelli, L., Singh, K.B.,  
795 Manners, J.M. and Taylor, J.M.** (2016) EffectorP: predicting fungal effector proteins  
796 from secretomes using machine learning. *New Phytologist*, **210**, 743-761.
- 797 **Tatarinova, T.V., Chekalin, E., Nikolsky, Y., Bruskin, S., Chebotarov, D., McNally, K.L.  
798 and Alexandrov, N.** (2016) Nucleotide diversity analysis highlights functionally  
799 important genomic regions. *Proceedings of the National Academy of Sciences*, **6**,  
800 35730.
- 801 **Therneau, T., Atkinson, B. and Ripley, B.** (2017) Recursive Partitioning and Regression  
802 Trees.
- 803 **Troyanskaya, O.G., Dolinski, K., Owen, A.B., Altman, R.B. and Botstein, D.** (2003) A  
804 Bayesian framework for combining heterogeneous data sources for gene function  
805 prediction (in *Saccharomyces cerevisiae*). *Proceedings of the National Academy of  
806 Sciences*, **100**, 8348-8353.
- 807 **Wallace, S., Fleming, A., Wellman, C.H. and Beerling, D.J.** (2011) Evolutionary  
808 development of the plant and spore wall. *AoB Plants*, **2011**, plr027.
- 809 **Wang, H., Niu, Q.-W., Wu, H.-W., Liu, J., Ye, J., Yu, N. and Chua, N.-H.** (2015a) Analysis  
810 of non-coding transcriptome in rice and maize uncovers roles of conserved lncRNAs  
811 associated with agriculture traits. *The Plant Journal*, **84**, 404-416.
- 812 **Wang, J., Qi, M., Liu, J. and Zhang, Y.** (2015b) CARMO: a comprehensive annotation  
813 platform for functional exploration of rice multi-omics data. *The Plant Journal*, **83**,  
814 359-374.

- 815 **Wang, M., Wu, H.-J., Fang, J., Chu, C. and Wang, X.-J.** (2017) A long noncoding RNA  
816 involved in rice reproductive development by negatively regulating osa-miR160.  
817 *Science Bulletin*, **62**, 470-475.
- 818 **Ware, D., Jaiswal, P., Ni, J., Pan, X., Chang, K., Clark, K., Teytelman, L., Schmidt, S.,**  
819 **Zhao, W., Cartinhour, S., McCouch, S. and Stein, L.** (2002) Gramene: a resource  
820 for comparative grass genomics. *Nucleic Acids Research*, **30**, 103-105.
- 821 **Wen, K., Yang, L., Xiong, T., Di, C., Ma, D., Wu, M., Xue, Z., Zhang, X., Long, L., Zhang,**  
822 **W., Zhang, J., Bi, X., Dai, J., Zhang, Q., Lu, Z.J. and Gao, G.** (2016) Critical roles  
823 of long noncoding RNAs in Drosophila spermatogenesis. *Genome Research*, **26**, 1233-  
824 1244.
- 825 **Wollstein, A. and Stephan, W.** (2015) Inferring positive selection in humans from genomic  
826 data. *Investigative Genetics*, **6**, 5.
- 827 **Yano, K., Yamamoto, E., Aya, K., Takeuchi, H., Lo, P.-c., Hu, L., Yamasaki, M., Yoshida,**  
828 **S., Kitano, H., Hirano, K. and Matsuoka, M.** (2016) Genome-wide association study  
829 using whole-genome sequencing rapidly identifies new genes influencing agronomic  
830 traits in rice. *Nat Genet*, **48**, 927-934.
- 831 **Yao, W., Li, G., Yu, Y. and Ouyang, Y.** (2017) funRiceGenes dataset for comprehensive  
832 understanding and application of rice functional genes. *GigaScience*, gix119-gix119.
- 833 **You, Q., Zhang, L., Yi, X., Zhang, K., Yao, D., Zhang, X., Wang, Q., Zhao, X., Ling, Y.,**  
834 **Xu, W., Li, F. and Su, Z.** (2016) Co-expression network analyses identify functional  
835 modules associated with development and stress response in *Gossypium arboreum*. *Nat*  
836 *Reports*, **6**, 38436.
- 837 **Yun, D., Liang, W., Dreni, L., Yin, C., Zhou, Z., Kater, M.M. and Zhang, D.** (2013)  
838 OsMADS16 genetically interacts with OsMADS3 and OsMADS58 in specifying floral  
839 patterning in rice. *Molecular Plant*, **6**, 743-756.
- 840 **Zhang, Y.-C., Liao, J.-Y., Li, Z.-Y., Yu, Y., Zhang, J.-P., Li, Q.-F., Qu, L.-H., Shu, W.-S.**  
841 **and Chen, Y.-Q.** (2014) Genome-wide screening and functional analysis identify a  
842 large number of long noncoding RNAs involved in the sexual reproduction of rice.  
843 *Genome Biology*, **15**, 512.
- 844 **Zhao, L., Lei, J., Huang, Y., Zhu, S., Chen, H., Huang, R., Peng, Z., Tu, Q., Shen, X. and**  
845 **Yan, S.** (2016) Mapping quantitative trait loci for heat tolerance at anthesis in rice using  
846 chromosomal segment substitution lines. *Breeding Science*, **66**, 358-366.
- 847 **Zhou, Z., Jiang, Y., Wang, Z., Gou, Z., Lyu, J., Li, W., Yu, Y., Shu, L., Zhao, Y., Ma, Y.,**  
848 **Fang, C., Shen, Y., Liu, T., Li, C., Li, Q., Wu, M., Wang, M., Wu, Y., Dong, Y.,**  
849 **Wan, W., Wang, X., Ding, Z., Gao, Y., Xiang, H., Zhu, B., Lee, S.-H., Wang, W.**  
850 **and Tian, Z.** (2015) Resequencing 302 wild and cultivated accessions identifies genes  
851 related to domestication and improvement in soybean. *Nat Biotech*, **33**, 408-414.

852

853

## 854 **Supporting Information**

855 **Fig. S1** Distribution of tissues/cell types with peak expression levels of putative protein coding  
856 genes not found in MSU-RAP annotation

857 **Fig. S2** Heatmap representing expression of all coding and non-coding genes

858 **Fig. S3** Distribution of PI scores for coding and non-coding genes

859 **Fig. S4** Comparison of classifier performance for three different biological processes

860 **Fig. S5** Comparison of classifier performance for three different biological processes with  
861 scrambled labels

862 **Fig. S6** Number of shared SexRep genes identified by Naïve Bayes Classifier while varying  
863 alpha and zeta parameters of PI score

864 **Fig. S7** Overlap between results of five MCRiceRepGP runs using different negative training  
865 sets for coding and lincRNA genes

866 **Table S1** Datasets used in the analysis

867 **Table S2** Summary of annotation statistics

868 **Table S3** Comparison between current annotation and existing lincRNA annotations

869 **Table S4** Classification of samples as reproductive or vegetative

870 **Table S5** Dictionary of GO phrases associated with sexual reproduction

871 **Table S6** Classification of phenotypes as vegetative or reproductive

872 **Table S7** Biological process GO enrichment of 200 top genes as ranked by PI score

873 **Table S8** Biological process GO enrichment of 500 randomly chosen genes from bottom 95%  
874 as ranked by PI score

875 **Table S9** All SexRep genes identified

876 **Table S10** Biological processes GO enrichment of SexRep genes

877 **Table S11** Molecular function GO enrichment of SexRep genes

878 **Table S12** Biological processes GO enrichment of SexRep genes falling within top 5% of most  
879 differentiated genomic regions between indica and japonica lines

- 880 **Table S13** Anther dehiscence associated genes found in Supplementary table 12
- 881 **Table S14** SexRep gene overlapping sterility associated SNPs
- 882 **Method S1** Commands used for external software packages
- 883 **Method S2** Details of classifier implementation
- 884 **Note S1** Rice genome re-annotation
- 885 **Note S2** PI score parametrization for sexual reproduction
- 886 **Note S3** Comparison of classifiers used for identification of genes involved in three distinct  
887 biological processes
- 888 **Note S4** Naïve Bayes Classifier Performance with varying Process Involvement score  
889 parameters
- 890 **Note S5** Concordance between genes identified by classifiers built using different negative  
891 training sets

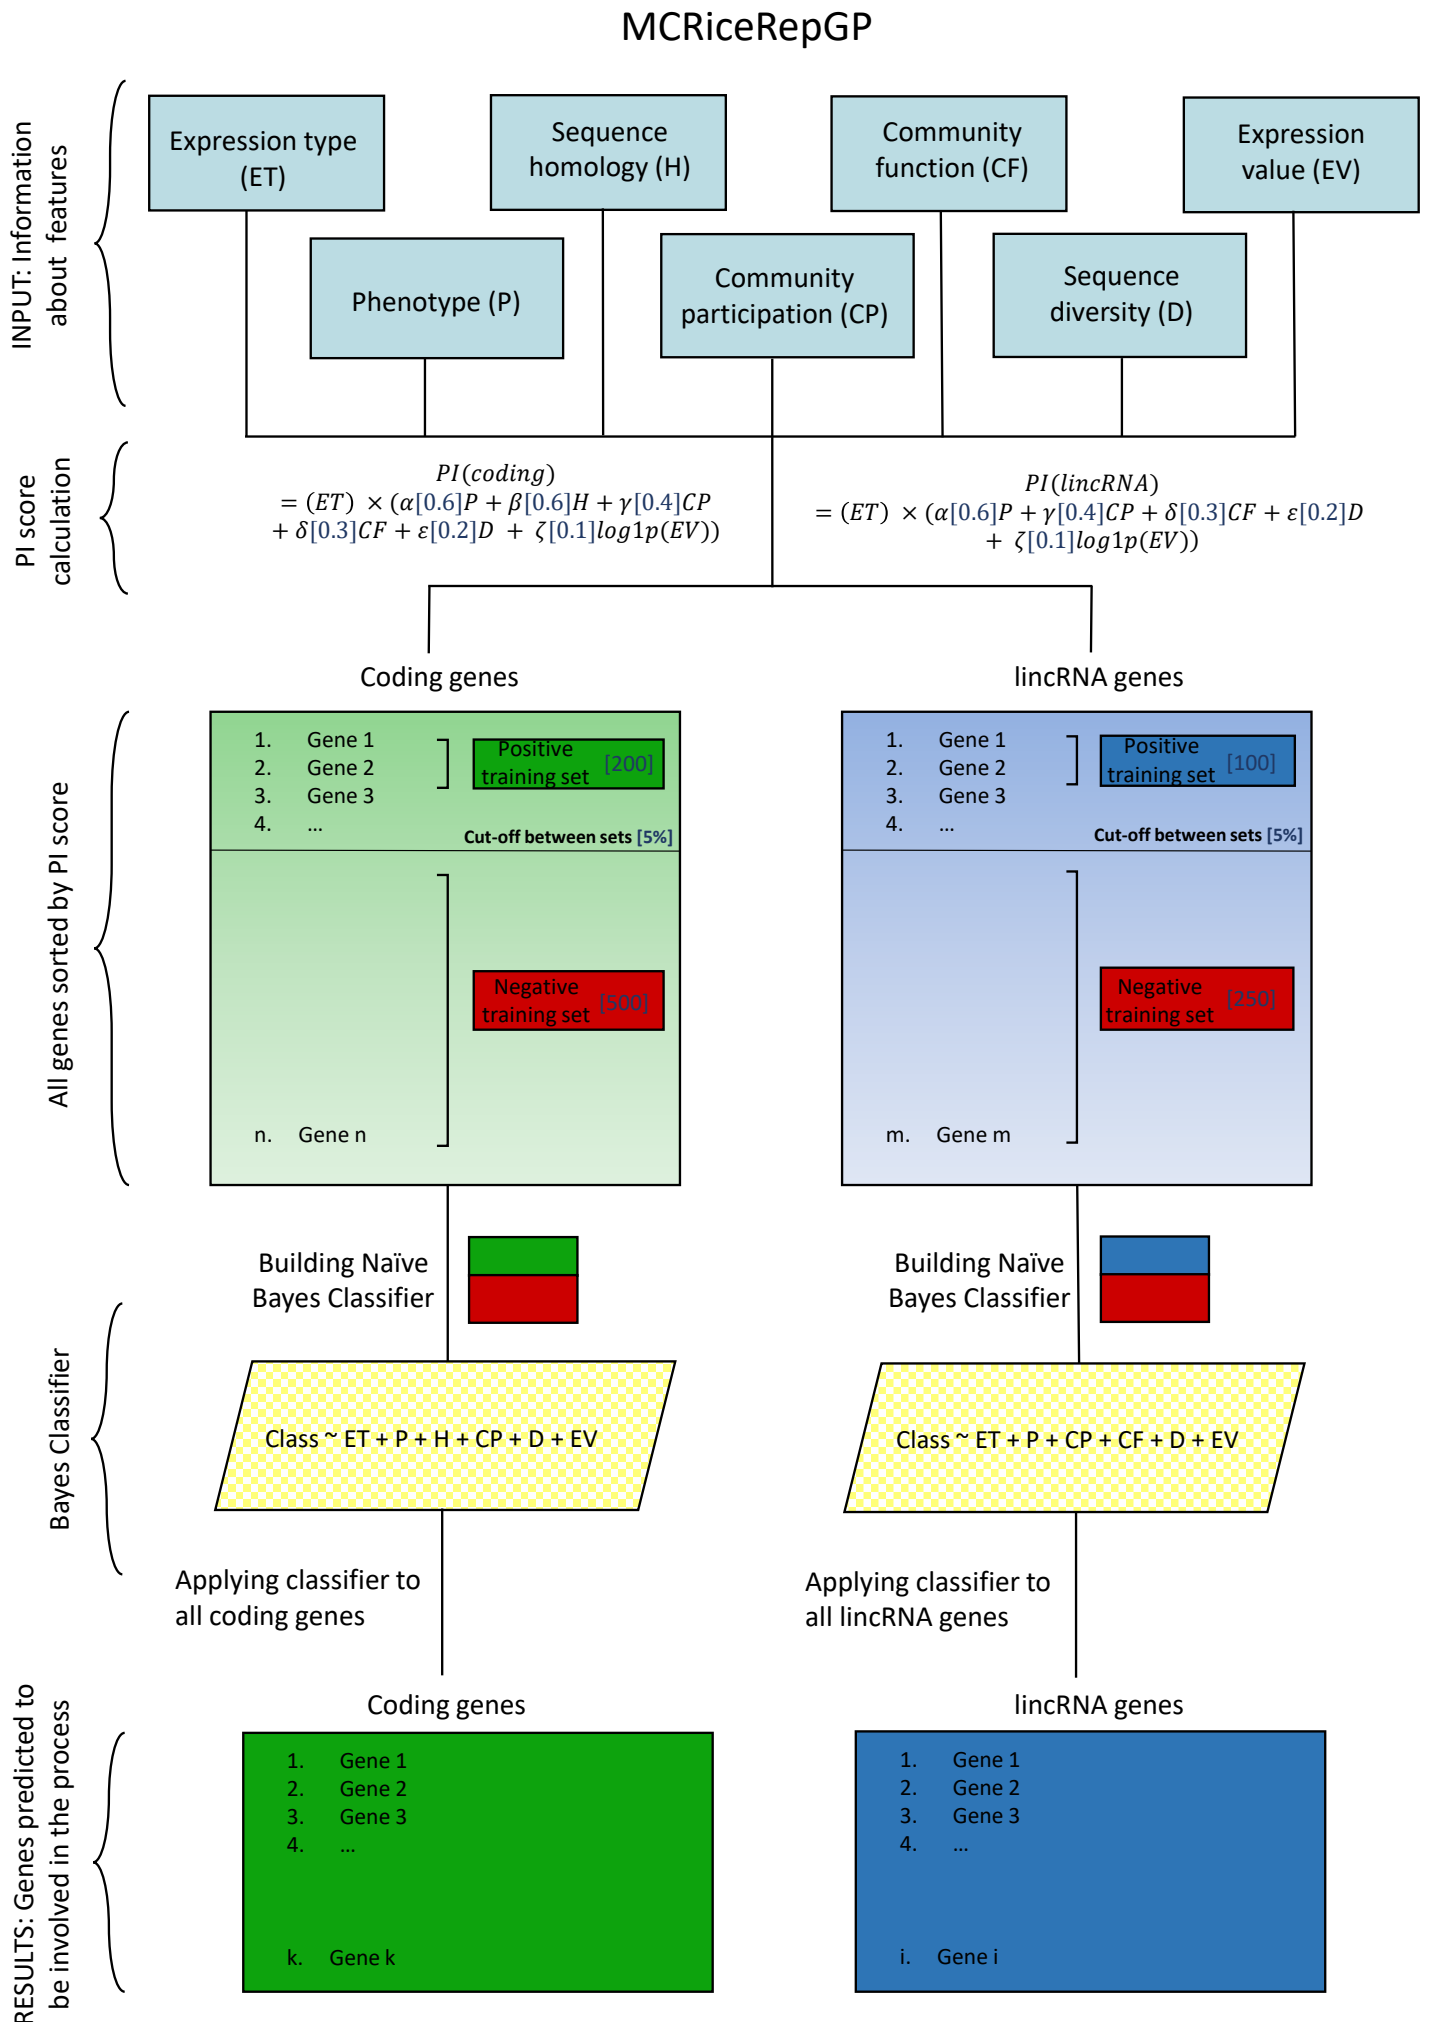

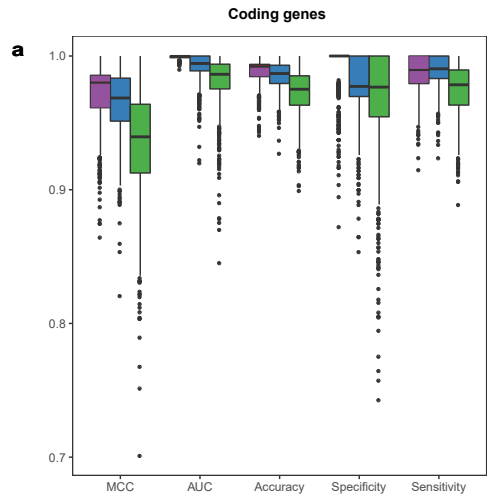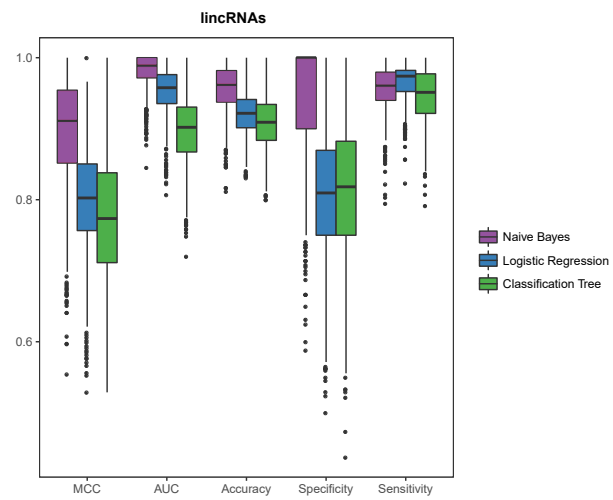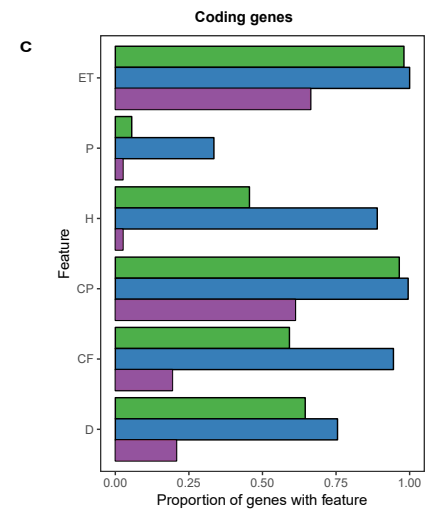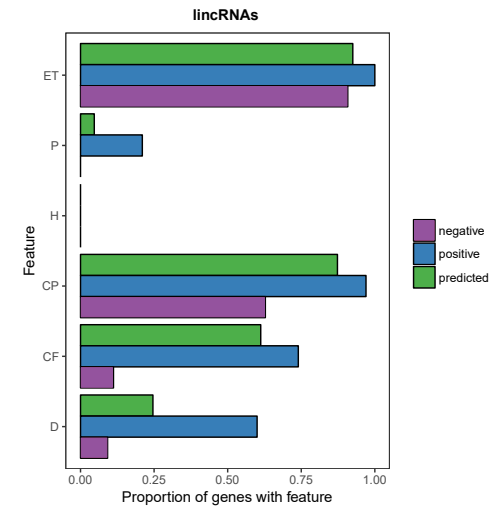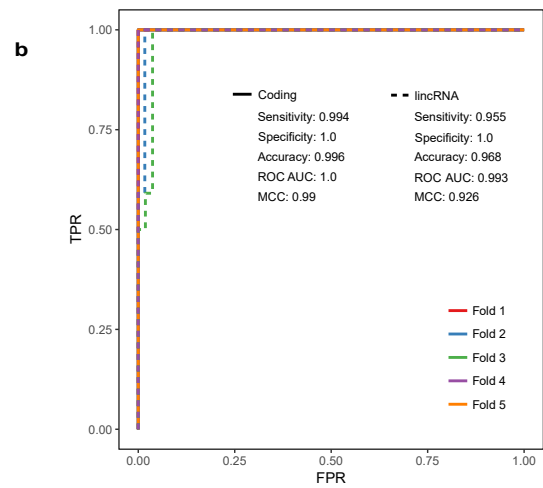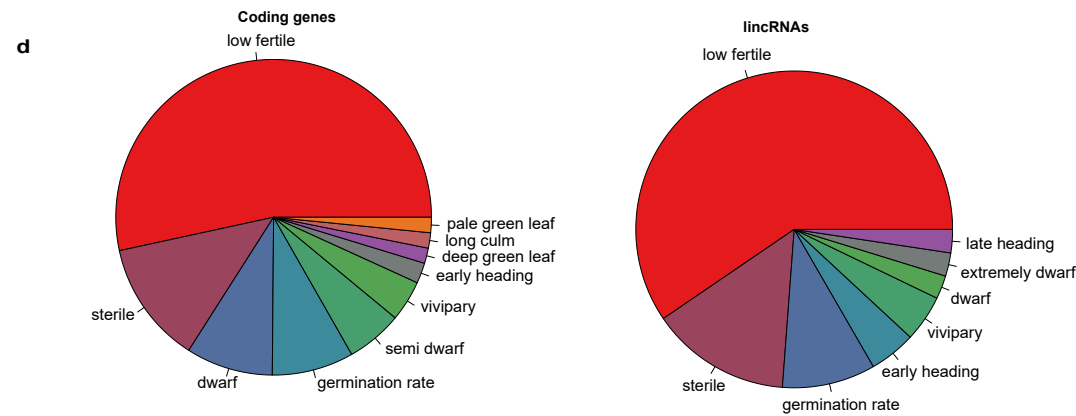

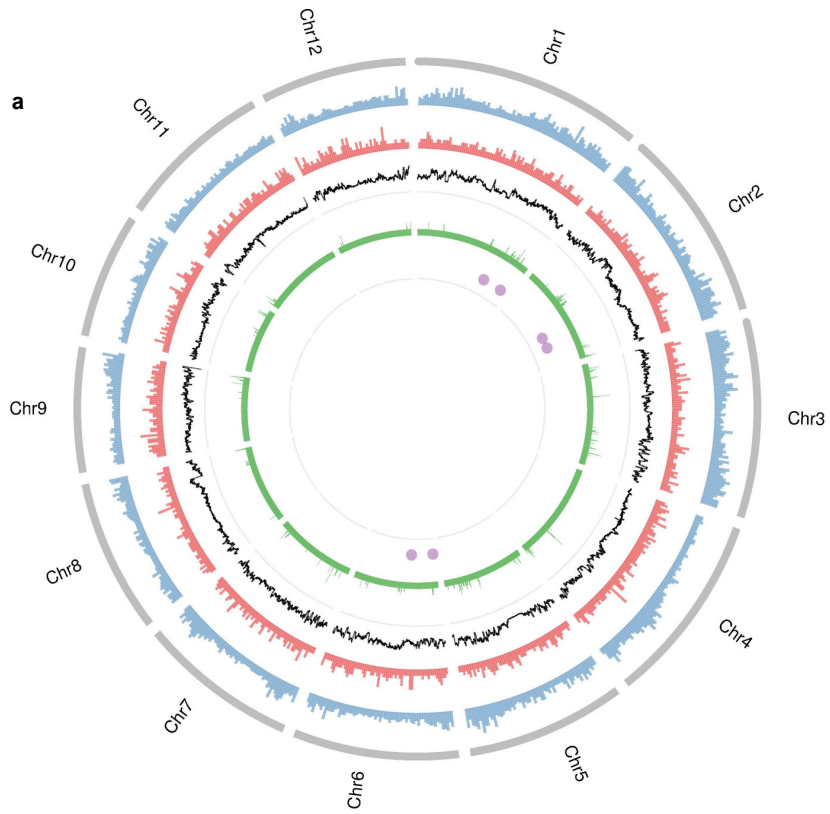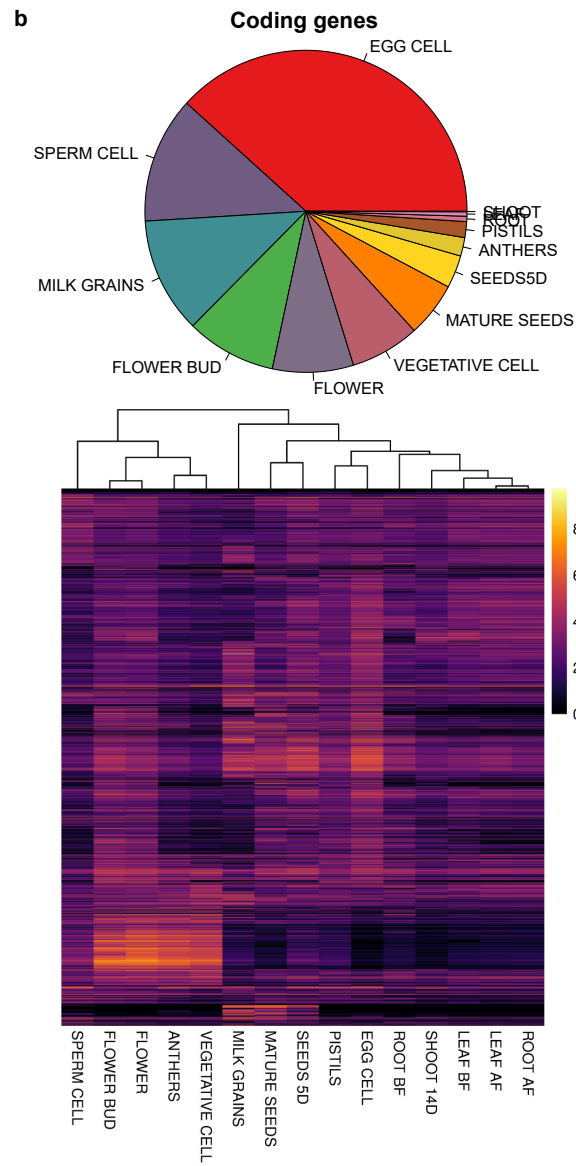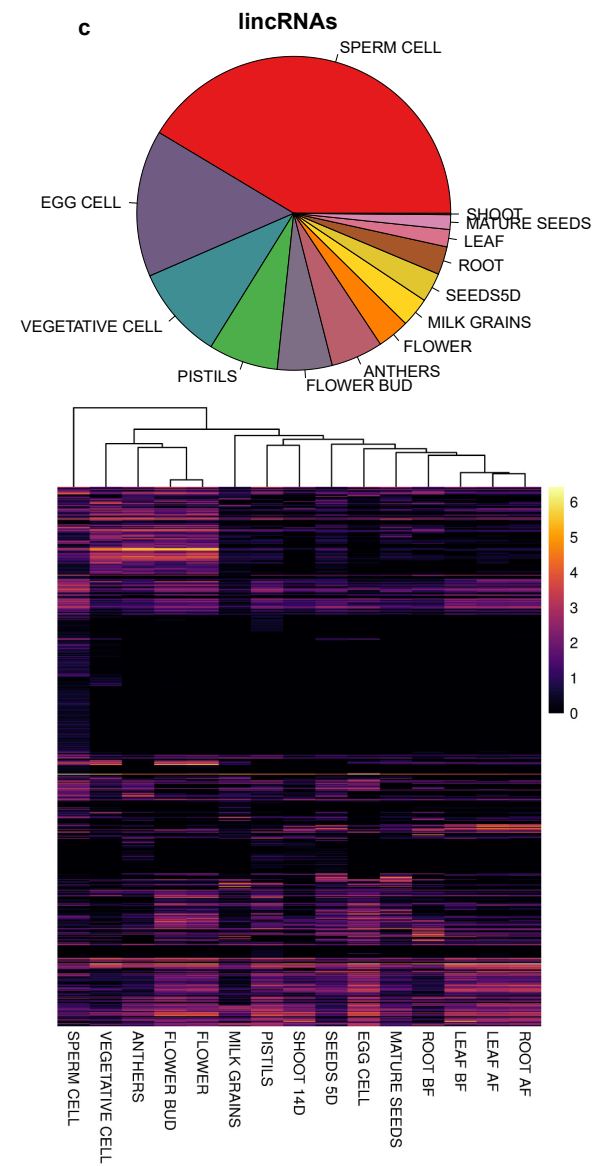



### Coding genes

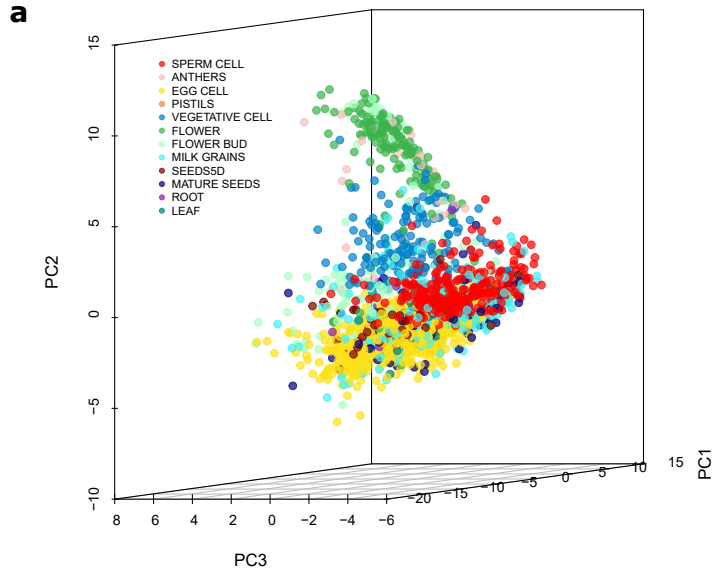

### lincRNAs

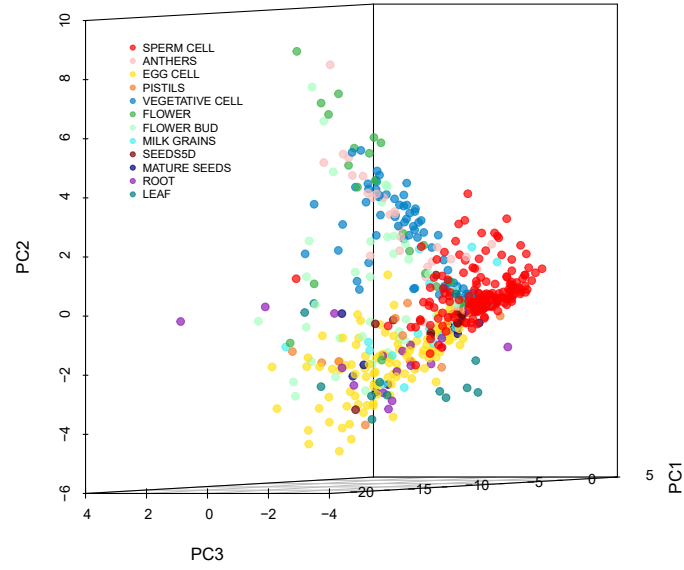

### Coding genes

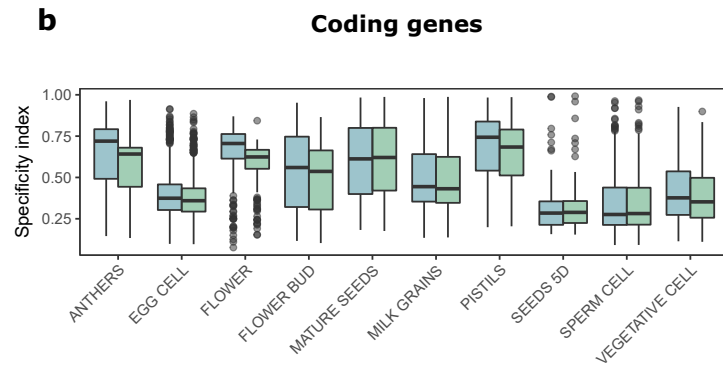

### lincRNAs

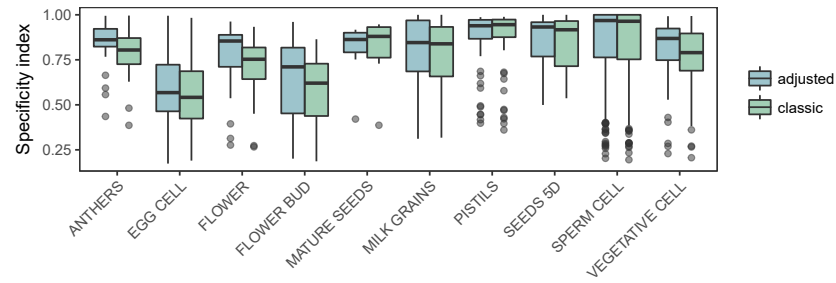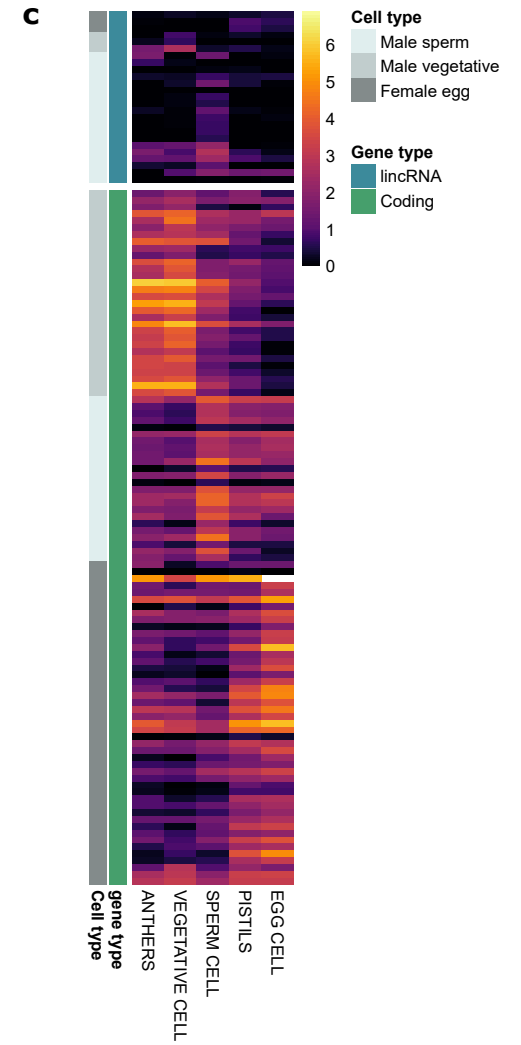

# MCRiceRepGP

Expression type

Key words

PI score parameters

Gene type

Classifier features to include

**Tissue type (ET):**

**Key words or phrases to include**

**Key words or phrases to exclude**

**Phenotype (P):**

**Homology (H):**

**Community participation (CP):**

**Community function (CF):**

**Sequence diversity (D):**

**Expression value (EV):**

**Size of positive training set:**

**Size of negative training set:**

**Percentage cut-off between positive and negative set**

**Coding or non-coding**

**Features to be used in the classifier**

- ET
- P
- H
- CP
- CF
- D
- EV

[Run MCRiceRepGP](#) [Download results](#)

Analysis Help

Session id: MCRiceRepGP24Feb2018031544

Sensitivity: 0.9967213(0.00733137)  
 Specificity: 0.9614976(0.03786712)  
 Accuracy: 0.9872044(0.01291534)  
 AUC: 0.9989975(0.001776838)  
 MCC: 0.9665674(0.03367194)

Classifier statistics

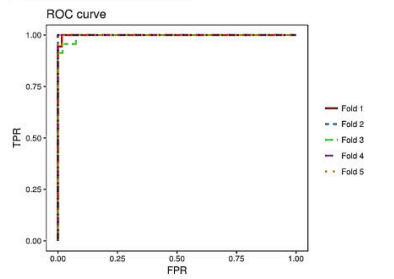

ROC curve for classifier

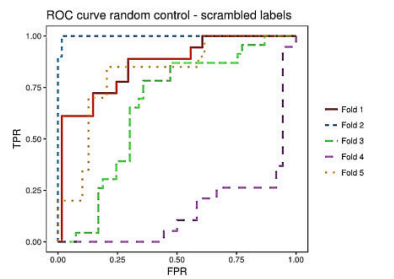

ROC curve for control classifier

|   | GeneID         | ET | EV   | P | H | CP | CF | D | PI   | MSU-RAP        |
|---|----------------|----|------|---|---|----|----|---|------|----------------|
| 1 | OSATST00018594 | 1  | 6.02 | 1 | 1 | 1  | 1  | 1 | 2.70 | LOC_Os02g02560 |
| 2 | OSATST00027308 | 1  | 4.20 | 1 | 1 | 1  | 1  | 1 | 2.52 | LOC_Os03g24170 |
| 3 | OSATST00041382 | 1  | 4.13 | 1 | 1 | 1  | 1  | 1 | 2.51 | LOC_Os06g08380 |
| 4 | OSATST00035108 | 1  | 4.34 | 1 | 1 | 1  | 1  | 0 | 2.33 | LOC_Os04g52450 |
| 5 | OSATST00003715 | 1  | 3.98 | 1 | 1 | 1  | 1  | 0 | 2.30 | LOC_Os01g42060 |
| 6 | OSATST00011253 | 1  | 3.59 | 1 | 1 | 1  | 1  | 0 | 2.26 | LOC_Os11g04840 |
| 7 | OSATST00027307 | 1  | 3.92 | 1 | 1 | 1  | 0  | 1 | 2.19 | LOC_Os03g24160 |
| 8 | OSATST00033548 | 1  | 6.92 | 1 | 0 | 1  | 1  | 1 | 2.19 | LOC_Os04g38560 |

Table with results
